# Supplementary material for: Chalcone Derivative CX258 Suppresses Colorectal Cancer via Inhibiting the TOP2A/Wnt/β-Catenin Signaling
Source: Cells. 2023 Mar 31;12(7):1066. doi: 10.3390/cells12071066 (PMC10093515; doi:10.3390/cells12071066)
Supplement: Supplementary file 1 [file cells-12-01066-s001.zip › Table S1.xlsx]

## Sheet: Table S1
Gene ID	Gene Symbol	Type	log2 (CX258 / DMSO)	Qvalue (CX258 / DMSO)
7153	'TOP2A'	mRNA	-2.31647	0
1026	'CDKN1A'	mRNA	2.01187	1.55001e-286
218	'ALDH3A1'	mRNA	2.50784	1.53748e-257
6241	'RRM2'	mRNA	-2.17318	4.15608e-257
113130	'CDCA5'	mRNA	-2.26942	1.78373e-213
55355	'HJURP'	mRNA	-2.01004	1.283e-192
51203	'NUSAP1'	mRNA	-2.19569	2.62439e-184
4193	'MDM2'	mRNA	1.91747	1.46836e-177
983	'CDK1'	mRNA	-2.25169	4.48901e-172
55723	'ASF1B'	mRNA	-1.91926	2.54947e-171
11065	'UBE2C'	mRNA	-2.29276	2.3356e-170
3833	'KIFC1'	mRNA	-2.02126	3.79172e-159
360	'AQP3'	mRNA	1.65176	3.42153e-158
10797	'MTHFD2'	mRNA	-1.53204	2.23073e-157
55215	'FANCI'	mRNA	-1.92249	2.76698e-151
10376	'TUBA1B'	mRNA	-1.2169	1.61557e-149
128239	'IQGAP3'	mRNA	-2.06662	3.14257e-148
1163	'CKS1B'	mRNA	-1.94746	8.14436e-146
9212	'AURKB'	mRNA	-2.19804	2.69227e-142
7083	'TK1'	mRNA	-1.61061	9.48667e-141
9518	'GDF15'	mRNA	1.63996	1.02804e-134
9088	'PKMYT1'	mRNA	-2.0011	3.39249e-131
23397	'NCAPH'	mRNA	-2.06956	3.43859e-128
11130	'ZWINT'	mRNA	-1.81561	2.68875e-127
85236	'H2BC12'	mRNA	1.95343	5.15767e-125
11004	'KIF2C'	mRNA	-2.07106	5.61178e-125
203068	'TUBB'	mRNA	-1.15509	4.69819e-119
10140	'TOB1'	mRNA	1.60233	1.23675e-117
3006	'H1-2'	mRNA	2.36406	2.29048e-117
90381	'TICRR'	mRNA	-2.18108	1.09559e-116
64151	'NCAPG'	mRNA	-1.97955	1.75059e-116
3832	'KIF11'	mRNA	-1.92601	1.60418e-114
4051	'CYP4F3'	mRNA	1.77008	3.55788e-114
81620	'CDT1'	mRNA	-1.89561	2.19458e-112
5106	'PCK2'	mRNA	-1.33523	1.39093e-111
9055	'PRC1'	mRNA	-1.63638	3.4654e-111
23612	'PHLDA3'	mRNA	1.75079	1.64747e-109
375791	'CYSRT1'	mRNA	1.48109	3.29489e-108
9401	'RECQL4'	mRNA	-1.56011	8.57321e-108
6941	'TCF19'	mRNA	-2.06622	2.30257e-104
54443	'ANLN'	mRNA	-1.80065	1.52699e-103
124976	'SPNS2'	mRNA	1.28226	9.52583e-103
8744	'TNFSF9'	mRNA	1.56063	1.19382e-100
3856	'KRT8'	mRNA	1.14981	3.02999e-99
701	'BUB1B'	mRNA	-1.60118	4.51746e-97
8318	'CDC45'	mRNA	-2.09535	4.94442e-97
4605	'MYBL2'	mRNA	-1.35486	3.74939e-96
79733	'E2F8'	mRNA	-2.26442	7.30457e-96
56992	'KIF15'	mRNA	-1.85566	9.16108e-96
64393	'ZMAT3'	mRNA	1.70133	1.99028e-94
150468	'CKAP2L'	mRNA	-2.10963	2.77383e-93
29028	'ATAD2'	mRNA	-1.68379	3.19498e-93
3925	'STMN1'	mRNA	-1.35262	7.97993e-90
3619	'INCENP'	mRNA	-1.46849	7.29171e-89
3835	'KIF22'	mRNA	-1.38309	8.52111e-87
3014	'H2AX'	mRNA	-1.47491	2.05295e-85
146909	'KIF18B'	mRNA	-1.9277	3.0266e-85
8438	'RAD54L'	mRNA	-1.90124	3.48654e-83
6509	'SLC1A4'	mRNA	-1.3984	4.35262e-83
3909	'LAMA3'	mRNA	1.70707	5.90301e-83
55143	'CDCA8'	mRNA	-1.83156	2.39026e-82
6240	'RRM1'	mRNA	-1.2878	7.40175e-82
26271	'FBXO5'	mRNA	-2.41268	1.13019e-81
6491	'STIL'	mRNA	-1.88938	1.09243e-79
2189	'FANCG'	mRNA	-1.65497	1.723e-79
4254	'KITLG'	mRNA	1.30153	6.18325e-79
10460	'TACC3'	mRNA	-1.22266	2.59487e-78
440	'ASNS'	mRNA	-1.1876	7.47526e-78
7832	'BTG2'	mRNA	1.36988	7.55688e-78
4176	'MCM7'	mRNA	-1.02881	6.36977e-77
4174	'MCM5'	mRNA	-1.17907	8.28592e-76
9493	'KIF23'	mRNA	-1.9213	1.70384e-75
9156	'EXO1'	mRNA	-1.9912	4.54475e-75
4288	'MKI67'	mRNA	-1.39926	5.70957e-75
63922	'CHTF18'	mRNA	-1.35868	2.86881e-73
57103	'TIGAR'	mRNA	1.69622	1.70468e-72
1728	'NQO1'	mRNA	1.03306	1.77991e-72
990	'CDC6'	mRNA	-1.48441	4.03991e-72
9700	'ESPL1'	mRNA	-1.84922	1.38071e-71
83461	'CDCA3'	mRNA	-1.92329	1.98643e-71
51514	'DTL'	mRNA	-1.70326	2.47679e-71
9833	'MELK'	mRNA	-1.84541	4.49901e-71
2175	'FANCA'	mRNA	-1.49549	9.6469e-71
6472	'SHMT2'	mRNA	-0.88751	9.87556e-71
9768	'PCLAF'	mRNA	-1.80157	1.38463e-70
83463	'MXD3'	mRNA	-2.30946	9.01817e-70
29127	'RACGAP1'	mRNA	-1.4467	2.63166e-69
29968	'PSAT1'	mRNA	-1.06179	2.65904e-69
5268	'SERPINB5'	mRNA	1.56278	3.36849e-69
10051	'SMC4'	mRNA	-1.19552	4.51053e-69
1645	'AKR1C1'	mRNA	1.68353	6.79903e-69
995	'CDC25C'	mRNA	-2.22198	7.48204e-69
2177	'FANCD2'	mRNA	-1.76282	9.67993e-69
54892	'NCAPG2'	mRNA	-1.34444	1.34599e-68
89891	'DYNC2I2'	mRNA	-1.11486	1.45934e-67
890	'CCNA2'	mRNA	-1.65887	1.53632e-67
79705	'LRRK1'	mRNA	1.18048	2.38113e-67
10733	'PLK4'	mRNA	-1.73648	1.15866e-66
8914	'TIMELESS'	mRNA	-1.24706	1.49576e-65
7468	'NSD2'	mRNA	-1.04411	1.52703e-65
641	'BLM'	mRNA	-1.97211	1.04665e-64
9735	'KNTC1'	mRNA	-1.52062	1.48616e-63
4998	'ORC1'	mRNA	-1.56746	1.33019e-62
113026	'PLCD3'	mRNA	0.968713	2.81118e-61
3880	'KRT19'	mRNA	0.957439	5.94655e-61
2237	'FEN1'	mRNA	-1.27967	6.55369e-61
374393	'FAM111B'	mRNA	-1.52514	9.92068e-61
5426	'POLE'	mRNA	-1.19527	2.68409e-59
1063	'CENPF'	mRNA	-1.13714	3.49843e-59
27113	'BBC3'	mRNA	1.23395	4.83931e-59
25886	'POC1A'	mRNA	-1.69569	5.12307e-59
10535	'RNASEH2A'	mRNA	-1.31512	5.44328e-59
10635	'RAD51AP1'	mRNA	-2.06564	6.58039e-59
9918	'NCAPD2'	mRNA	-0.971737	7.86975e-59
3875	'KRT18'	mRNA	1.04139	1.09458e-58
157313	'CDCA2'	mRNA	-1.65332	1.62751e-58
79019	'CENPM'	mRNA	-1.56578	2.23472e-58
9966	'TNFSF15'	mRNA	1.61226	3.40368e-58
285704	'RGMB'	mRNA	-1.14835	3.98035e-58
84706	'GPT2'	mRNA	-0.99318	8.02396e-58
4171	'MCM2'	mRNA	-1.1155	1.07558e-57
23649	'POLA2'	mRNA	-1.34167	2.86949e-57
4796	'TONSL'	mRNA	-1.26638	8.51321e-57
7112	'TMPO'	mRNA	-0.99173	1.62979e-56
24137	'KIF4A'	mRNA	-1.40764	2.24129e-56
94241	'TP53INP1'	mRNA	1.5843	3.70751e-56
10615	'SPAG5'	mRNA	-1.2488	4.05504e-56
4751	'NEK2'	mRNA	-1.81373	4.05504e-56
1786	'DNMT1'	mRNA	-1.00861	4.33583e-56
27346	'TMEM97'	mRNA	-1.10295	6.80726e-56
3148	'HMGB2'	mRNA	-1.2239	9.50883e-56
10036	'CHAF1A'	mRNA	-1.08411	1.08135e-55
284403	'WDR62'	mRNA	-1.39315	1.63951e-55
2232	'FDXR'	mRNA	1.09277	2.31477e-55
5985	'RFC5'	mRNA	-1.40667	3.89966e-55
1646	'AKR1C2'	mRNA	1.66961	4.63974e-55
221150	'SKA3'	mRNA	-1.52324	7.17613e-55
1999	'ELF3'	mRNA	1.03334	1.48465e-54
83990	'BRIP1'	mRNA	-1.88137	1.66558e-54
26227	'PHGDH'	mRNA	-0.947503	5.24779e-54
9793	'CKAP5'	mRNA	-0.969765	1.0443e-53
899	'CCNF'	mRNA	-1.47168	3.43946e-53
699	'BUB1'	mRNA	-1.26117	3.7299e-53
147920	'IGFL2'	mRNA	1.41086	4.19638e-53
10592	'SMC2'	mRNA	-1.1155	1.55681e-52
11270	'NRM'	mRNA	-1.4495	2.60229e-52
7398	'USP1'	mRNA	-1.22394	1.17713e-51
2305	'FOXM1'	mRNA	-1.3567	1.18567e-51
26154	'ABCA12'	mRNA	2.99353	1.81415e-51
672	'BRCA1'	mRNA	-1.44885	2.26368e-51
11113	'CIT'	mRNA	-1.53125	3.27996e-51
23234	'DNAJC9'	mRNA	-1.19522	1.41908e-50
4085	'MAD2L1'	mRNA	-1.32026	1.75472e-50
8337	'H2AC18'	mRNA	1.91997	2.71853e-50
9824	'ARHGAP11A'	mRNA	-1.41147	1.13571e-49
79075	'DSCC1'	mRNA	-1.73302	1.8233e-49
51659	'GINS2'	mRNA	-1.36607	3.69321e-49
16	'AARS1'	mRNA	-0.829573	1.05391e-48
468	'ATF4'	mRNA	-0.802868	2.81322e-48
7272	'TTK'	mRNA	-1.82966	3.62312e-48
55038	'CDCA4'	mRNA	-1.373	4.05044e-48
22824	'HSPA4L'	mRNA	1.0235	5.02995e-48
7298	'TYMS'	mRNA	-0.934794	5.09871e-48
220134	'SKA1'	mRNA	-1.92699	5.81297e-48
124975	'GGT6'	mRNA	1.09035	6.392e-48
1663	'DDX11'	mRNA	-0.879844	6.4738e-48
10403	'NDC80'	mRNA	-1.7609	2.55355e-47
147841	'SPC24'	mRNA	-2.16171	3.23819e-47
22974	'TPX2'	mRNA	-0.920914	5.21878e-47
81610	'FAM83D'	mRNA	-1.41835	5.51205e-47
51512	'GTSE1'	mRNA	-1.4534	5.57075e-47
8349	'H2BC21'	mRNA	1.81487	1.04473e-46
675	'BRCA2'	mRNA	-1.85203	1.28495e-46
27244	'SESN1'	mRNA	1.47389	1.46327e-46
10769	'PLK2'	mRNA	1.43377	1.68503e-46
5888	'RAD51'	mRNA	-1.78827	1.8284e-46
8243	'SMC1A'	mRNA	-0.894566	3.49751e-46
10725	'NFAT5'	mRNA	1.21834	3.91145e-46
80179	'MYO19'	mRNA	-1.0118	4.09851e-46
57405	'SPC25'	mRNA	-2.01165	1.21822e-45
4678	'NASP'	mRNA	-0.984823	2.8189e-45
1869	'E2F1'	mRNA	-1.29802	4.68401e-45
259266	'ASPM'	mRNA	-1.54425	1.42468e-44
9582	'APOBEC3B'	mRNA	-1.61596	1.80083e-44
79682	'CENPU'	mRNA	-1.51979	2.13301e-44
1978	'EIF4EBP1'	mRNA	-0.825883	2.99694e-44
3838	'KPNA2'	mRNA	-0.95582	3.81131e-44
1719	'DHFR'	mRNA	-0.983234	3.97052e-44
57082	'KNL1'	mRNA	-1.62839	4.59482e-44
79022	'TMEM106C'	mRNA	-0.863837	1.05671e-43
4173	'MCM4'	mRNA	-0.823623	1.1005e-43
8208	'CHAF1B'	mRNA	-1.35418	1.45022e-43
2491	'CENPI'	mRNA	-1.87814	1.93532e-43
151354	'LRATD1'	mRNA	1.06024	3.58867e-43
84722	'PSRC1'	mRNA	-1.36374	4.27185e-43
8795	'TNFRSF10B'	mRNA	0.888969	5.36602e-43
57822	'GRHL3'	mRNA	1.40535	5.5717e-43
157570	'ESCO2'	mRNA	-2.10827	6.46234e-43
55872	'PBK'	mRNA	-1.42002	7.34436e-43
56243	'KIAA1217'	mRNA	1.1015	1.0683e-42
80178	'TEDC2'	mRNA	-1.51122	1.17311e-42
55240	'STEAP3'	mRNA	1.07375	1.6378e-42
27350	'APOBEC3C'	mRNA	1.11144	8.69094e-42
9585	'KIF20B'	mRNA	-1.45996	1.47934e-41
57761	'TRIB3'	mRNA	-0.950209	2.29507e-41
1031	'CDKN2C'	mRNA	-1.80901	2.66429e-41
9319	'TRIP13'	mRNA	-1.19898	3.59079e-41
2166	'FAAH'	mRNA	-0.934278	5.6929e-41
80777	'CYB5B'	mRNA	0.955942	1.13076e-40
347240	'KIF24'	mRNA	-2.11494	2.06659e-40
23120	'ATP10B'	mRNA	0.901681	2.22424e-40
51474	'LIMA1'	mRNA	0.88335	2.22424e-40
55165	'CEP55'	mRNA	-1.25227	2.22424e-40
219790	'RTKN2'	mRNA	-1.6114	2.80679e-40
5983	'RFC3'	mRNA	-1.46243	3.11506e-40
79094	'CHAC1'	mRNA	-1.19238	4.94253e-40
84515	'MCM8'	mRNA	-1.33171	5.39951e-40
3158	'HMGCS2'	mRNA	1.94504	6.02903e-40
23310	'NCAPD3'	mRNA	-0.960817	8.10824e-40
6890	'TAP1'	mRNA	0.854567	1.04708e-39
84930	'MASTL'	mRNA	-1.36154	1.39629e-39
84790	'TUBA1C'	mRNA	-0.748183	2.07139e-39
124935	'SLC43A2'	mRNA	1.13496	2.3059e-39
5557	'PRIM1'	mRNA	-1.39554	4.71872e-39
113115	'MTFR2'	mRNA	-2.05661	5.45367e-39
64782	'AEN'	mRNA	0.937427	7.57689e-39
8479	'HIRIP3'	mRNA	-1.36026	1.00236e-38
10721	'POLQ'	mRNA	-1.69394	1.24241e-38
1017	'CDK2'	mRNA	-0.970862	3.86284e-38
3070	'HELLS'	mRNA	-1.30661	3.88406e-38
23204	'ARL6IP1'	mRNA	-0.93534	6.31678e-38
54478	'PIMREG'	mRNA	-1.46743	1.10617e-37
83879	'CDCA7'	mRNA	-0.909066	1.1428e-37
1647	'GADD45A'	mRNA	0.961975	1.18309e-37
57650	'CIP2A'	mRNA	-1.45854	1.21462e-37
1763	'DNA2'	mRNA	-1.85904	1.27405e-37
7465	'WEE1'	mRNA	-1.26348	1.27741e-37
6839	'SUV39H1'	mRNA	-1.47202	2.21158e-37
8501	'SLC43A1'	mRNA	-1.08846	2.47655e-37
115703	'ARHGAP33'	mRNA	-1.82564	2.70995e-37
11169	'WDHD1'	mRNA	-1.35334	4.48147e-37
54930	'HAUS4'	mRNA	-1.08063	6.08829e-37
55835	'CENPJ'	mRNA	-1.43288	9.99513e-37
4000	'LMNA'	mRNA	0.771942	1.04184e-36
197335	'WDR90'	mRNA	-1.19513	1.19951e-36
284992	'CCDC150'	mRNA	-2.049	1.24406e-36
5757	'PTMA'	mRNA	-0.656651	1.53059e-36
7443	'VRK1'	mRNA	-1.35498	3.10671e-36
6949	'TCOF1'	mRNA	-0.870587	3.45724e-36
10616	'RBCK1'	mRNA	-0.731879	3.98852e-36
3397	'ID1'	mRNA	0.639198	4.89656e-36
8574	'AKR7A2'	mRNA	-0.832289	4.98591e-36
9361	'LONP1'	mRNA	-0.74976	1.02853e-35
54821	'ERCC6L'	mRNA	-2.06037	1.31737e-35
29128	'UHRF1'	mRNA	-1.13164	3.0277e-35
9787	'DLGAP5'	mRNA	-1.20778	3.87375e-35
79968	'WDR76'	mRNA	-1.33081	4.73591e-35
10293	'TRAIP'	mRNA	-1.727	5.68e-35
26147	'PHF19'	mRNA	-1.0989	6.96363e-35
7803	'PTP4A1'	mRNA	0.865132	7.21723e-35
580	'BARD1'	mRNA	-1.70534	7.29254e-35
8503	'PIK3R3'	mRNA	1.01644	1.10141e-34
55839	'CENPN'	mRNA	-1.21641	1.32963e-34
11200	'CHEK2'	mRNA	-1.32558	1.3539e-34
50484	'RRM2B'	mRNA	1.19951	1.3539e-34
5424	'POLD1'	mRNA	-1.01676	1.70188e-34
29781	'NCAPH2'	mRNA	-1.02882	1.8298e-34
66002	'CYP4F12'	mRNA	0.976537	2.37934e-34
55247	'NEIL3'	mRNA	-2.28055	2.45171e-34
146956	'EME1'	mRNA	-1.80891	3.14545e-34
224	'ALDH3A2'	mRNA	0.729747	4.77688e-34
5818	'NECTIN1'	mRNA	0.952468	4.88747e-34
51087	'YBX2'	mRNA	-0.953934	6.7832e-34
4175	'MCM6'	mRNA	-0.824699	8.17067e-34
55332	'DRAM1'	mRNA	1.4644	9.40057e-34
7508	'XPC'	mRNA	0.820381	9.40057e-34
10024	'TROAP'	mRNA	-1.20963	1.05714e-33
83903	'HASPIN'	mRNA	-1.69607	1.0793e-33
5211	'PFKL'	mRNA	-0.710054	1.19318e-33
4522	'MTHFD1'	mRNA	-0.751	1.73304e-33
51499	'TRIAP1'	mRNA	1.18201	2.57584e-33
3487	'IGFBP4'	mRNA	-0.723846	3.23558e-33
80183	'RUBCNL'	mRNA	-0.926983	9.00299e-33
55040	'EPN3'	mRNA	1.16833	9.49248e-33
348654	'GEN1'	mRNA	-1.34435	1.39982e-32
83540	'NUF2'	mRNA	-1.38936	1.43667e-32
1111	'CHEK1'	mRNA	-1.18462	2.17918e-32
91433	'RCCD1'	mRNA	-1.06645	4.80266e-32
64403	'CDH24'	mRNA	-1.04305	5.16616e-32
84057	'MND1'	mRNA	-1.93391	5.21363e-32
10038	'PARP2'	mRNA	-1.08017	5.54184e-32
54858	'PGPEP1'	mRNA	0.918612	7.77314e-32
63967	'CLSPN'	mRNA	-1.62734	1.03638e-31
29965	'CDIP1'	mRNA	1.62721	1.04351e-31
55789	'DEPDC1B'	mRNA	-1.34211	1.65354e-31
8644	'AKR1C3'	mRNA	0.879749	1.81687e-31
2810	'SFN'	mRNA	0.726125	1.9576e-31
126353	'MISP'	mRNA	0.656938	2.16244e-31
26999	'CYFIP2'	mRNA	0.780059	2.22955e-31
84798	'C19orf48'	mRNA	-0.62306	2.80247e-31
55536	'CDCA7L'	mRNA	-1.00922	3.35259e-31
6997	'TDGF1'	mRNA	-1.79111	3.45689e-31
55755	'CDK5RAP2'	mRNA	-0.836649	4.01743e-31
1947	'EFNB1'	mRNA	0.73791	4.56493e-31
5655	'KLK10'	mRNA	0.640209	5.00474e-31
64710	'NUCKS1'	mRNA	-0.726607	5.87832e-31
55388	'MCM10'	mRNA	-1.36976	8.97025e-31
8549	'LGR5'	mRNA	-0.961679	9.97851e-31
11073	'TOPBP1'	mRNA	-0.84729	2.17845e-30
1153	'CIRBP'	mRNA	-0.771878	2.96717e-30
5885	'RAD21'	mRNA	-0.708623	3.27215e-30
1894	'ECT2'	mRNA	-0.771419	3.94471e-30
9133	'CCNB2'	mRNA	-0.906231	5.9924e-30
1870	'E2F2'	mRNA	-1.19498	7.86098e-30
116151	'FAM210B'	mRNA	0.73941	8.3618e-30
2146	'EZH2'	mRNA	-0.915118	1.09071e-29
8878	'SQSTM1'	mRNA	0.642493	1.13503e-29
23306	'NEMP1'	mRNA	-1.10392	1.23691e-29
116496	'NIBAN1'	mRNA	-1.16926	1.34324e-29
51065	'RPS27L'	mRNA	1.16749	1.43725e-29
80329	'ULBP1'	mRNA	-2.1374	1.49151e-29
163786	'SASS6'	mRNA	-1.4862	2.13115e-29
7913	'DEK'	mRNA	-0.659909	2.65992e-29
23468	'CBX5'	mRNA	-0.911341	2.69553e-29
151648	'SGO1'	mRNA	-1.50313	3.55113e-29
79915	'ATAD5'	mRNA	-1.69955	4.36653e-29
894	'CCND2'	mRNA	0.660117	4.82884e-29
55196	'RESF1'	mRNA	0.784659	5.31725e-29
3017	'H2BC5'	mRNA	1.52831	5.40733e-29
6820	'SULT2B1'	mRNA	1.34354	5.98386e-29
90379	'DCAF15'	mRNA	-0.756672	6.0094e-29
728833	'FAM72D'	mRNA	-2.33638	8.27337e-29
55635	'DEPDC1'	mRNA	-1.26616	8.48445e-29
55345	'ZGRF1'	mRNA	-1.87115	9.41578e-29
3978	'LIG1'	mRNA	-0.873599	1.05745e-28
10973	'ASCC3'	mRNA	0.926338	1.07502e-28
6405	'SEMA3F'	mRNA	0.664443	1.17708e-28
27131	'SNX5'	mRNA	-0.759862	1.19186e-28
78995	'HROB'	mRNA	-1.70043	1.19914e-28
3015	'H2AZ1'	mRNA	-0.716199	2.56519e-28
56852	'RAD18'	mRNA	-1.26007	2.56519e-28
8793	'TNFRSF10D'	mRNA	0.810784	2.56519e-28
93323	'HAUS8'	mRNA	-1.44925	2.56519e-28
595	'CCND1'	mRNA	0.69273	3.56592e-28
23178	'PASK'	mRNA	-0.994773	3.77534e-28
4938	'OAS1'	mRNA	0.848209	3.85032e-28
132671	'SPATA18'	mRNA	1.3084	4.21984e-28
84904	'ARHGEF39'	mRNA	-1.01796	5.71598e-28
8727	'CTNNAL1'	mRNA	-1.10517	9.18852e-28
79801	'SHCBP1'	mRNA	-1.82005	9.34149e-28
1062	'CENPE'	mRNA	-1.07755	1.10943e-27
581	'BAX'	mRNA	1.07217	1.44891e-27
10926	'DBF4'	mRNA	-1.02613	1.54261e-27
80139	'ZNF703'	mRNA	0.795768	1.82416e-27
332	'BIRC5'	mRNA	-0.920341	1.86197e-27
59	'ACTA2'	mRNA	1.59755	2.13038e-27
64785	'GINS3'	mRNA	-1.20793	2.13038e-27
55732	'C1orf112'	mRNA	-1.56426	2.37031e-27
3161	'HMMR'	mRNA	-1.03835	2.44303e-27
4488	'MSX2'	mRNA	0.873781	3.04631e-27
5054	'SERPINE1'	mRNA	1.62127	3.24181e-27
29893	'PSMC3IP'	mRNA	-1.69642	3.31687e-27
29980	'DONSON'	mRNA	-1.10845	3.35338e-27
1308	'COL17A1'	mRNA	0.82556	4.09382e-27
55771	'PRR11'	mRNA	-1.21253	4.14443e-27
1058	'CENPA'	mRNA	-1.5193	5.46357e-27
11057	'ABHD2'	mRNA	0.810071	5.82973e-27
7283	'TUBG1'	mRNA	-0.693414	5.85178e-27
63979	'FIGNL1'	mRNA	-1.29712	5.95197e-27
116028	'RMI2'	mRNA	-1.46093	6.01699e-27
79980	'DSN1'	mRNA	-1.30605	6.01699e-27
255738	'PCSK9'	mRNA	-0.729508	7.33227e-27
1846	'DUSP4'	mRNA	0.738089	9.86664e-27
4001	'LMNB1'	mRNA	-0.892691	9.86664e-27
4602	'MYB'	mRNA	-0.760838	1.18335e-26
1841	'DTYMK'	mRNA	-0.922275	1.23662e-26
1854	'DUT'	mRNA	-0.896965	1.36844e-26
22995	'CEP152'	mRNA	-1.3223	1.49847e-26
55754	'TMEM30A'	mRNA	0.782557	1.49847e-26
7884	'SLBP'	mRNA	-0.662146	1.8027e-26
8794	'TNFRSF10C'	mRNA	1.76133	1.82583e-26
90417	'KNSTRN'	mRNA	-0.938769	2.11415e-26
3376	'IARS1'	mRNA	-0.572127	2.39879e-26
55959	'SULF2'	mRNA	1.33252	2.39879e-26
29089	'UBE2T'	mRNA	-0.983411	4.45959e-26
9982	'FGFBP1'	mRNA	-0.739547	4.48866e-26
9648	'GCC2'	mRNA	0.73205	4.86571e-26
55540	'IL17RB'	mRNA	-0.938656	5.20163e-26
11227	'GALNT5'	mRNA	0.871808	5.41715e-26
9702	'CEP57'	mRNA	-0.896538	5.41715e-26
3418	'IDH2'	mRNA	-0.635196	5.52618e-26
5019	'OXCT1'	mRNA	-0.763641	8.07766e-26
26509	'MYOF'	mRNA	0.718664	1.07513e-25
64105	'CENPK'	mRNA	-1.37686	1.10049e-25
9961	'MVP'	mRNA	0.682492	1.43677e-25
80727	'TTYH3'	mRNA	0.739288	1.47525e-25
5606	'MAP2K3'	mRNA	0.787809	1.63008e-25
55148	'UBR7'	mRNA	-0.930192	1.64465e-25
527	'ATP6V0C'	mRNA	0.728171	1.77829e-25
598	'BCL2L1'	mRNA	0.561297	1.78593e-25
3675	'ITGA3'	mRNA	0.691137	2.33329e-25
3613	'IMPA2'	mRNA	-0.81225	2.40117e-25
5933	'RBL1'	mRNA	-1.50989	2.82191e-25
10714	'POLD3'	mRNA	-1.20546	3.45097e-25
8824	'CES2'	mRNA	0.677508	3.6192e-25
6470	'SHMT1'	mRNA	-0.775205	3.66918e-25
970	'CD70'	mRNA	1.17381	3.8954e-25
4038	'LRP4'	mRNA	-0.739255	3.99999e-25
9987	'HNRNPDL'	mRNA	-0.698019	4.38153e-25
151246	'SGO2'	mRNA	-1.1826	4.57741e-25
7259	'TSPYL1'	mRNA	0.684382	4.59794e-25
54939	'COMMD4'	mRNA	-0.841931	4.82148e-25
102723996	'LOC102723996'	mRNA	-1.07243	5.00716e-25
202	'CRYBG1'	mRNA	-0.807172	5.37854e-25
2617	'GARS1'	mRNA	-0.614573	5.66073e-25
23654	'PLXNB2'	mRNA	0.754892	8.96258e-25
9618	'TRAF4'	mRNA	0.6888	9.97943e-25
5932	'RBBP8'	mRNA	-0.905163	1.10078e-24
6576	'SLC25A1'	mRNA	-0.674814	1.16283e-24
79172	'CENPO'	mRNA	-1.16291	1.74273e-24
993	'CDC25A'	mRNA	-1.07907	1.86258e-24
10449	'ACAA2'	mRNA	0.676697	2.50486e-24
157285	'PRAG1'	mRNA	0.819937	2.9273e-24
286257	'PAXX'	mRNA	-0.876341	4.41322e-24
6461	'SHB'	mRNA	0.638961	5.1006e-24
85014	'TMEM141'	mRNA	-0.702272	5.22018e-24
81624	'DIAPH3'	mRNA	-1.44038	5.67331e-24
204962	'SLC44A5'	mRNA	1.17732	5.89289e-24
196513	'DCP1B'	mRNA	0.891617	6.11334e-24
8437	'RASAL1'	mRNA	1.23166	6.60989e-24
64795	'RMND5A'	mRNA	0.716114	6.75895e-24
11168	'PSIP1'	mRNA	-0.654724	7.00365e-24
823	'CAPN1'	mRNA	0.577933	7.4177e-24
9928	'KIF14'	mRNA	-1.39205	8.8452e-24
84811	'BUD13'	mRNA	-0.828115	9.95129e-24
23354	'HAUS5'	mRNA	-0.815439	1.05772e-23
54480	'CHPF2'	mRNA	0.808571	1.14986e-23
9134	'CCNE2'	mRNA	-1.607	1.33319e-23
8848	'TSC22D1'	mRNA	0.516893	1.3552e-23
5613	'PRKX'	mRNA	0.943842	1.92919e-23
84131	'CEP78'	mRNA	-0.985466	1.92921e-23
9837	'GINS1'	mRNA	-1.33421	1.98929e-23
2289	'FKBP5'	mRNA	-1.34833	2.1441e-23
23479	'ISCU'	mRNA	0.690302	2.1441e-23
140576	'S100A16'	mRNA	0.577223	2.16029e-23
3976	'LIF'	mRNA	0.969622	2.21126e-23
23198	'PSME4'	mRNA	0.714681	2.42856e-23
2934	'GSN'	mRNA	0.830897	3.47433e-23
283643	'TEDC1'	mRNA	-1.15319	3.58096e-23
29899	'GPSM2'	mRNA	-0.673449	3.73527e-23
634	'CEACAM1'	mRNA	1.14022	4.16942e-23
79000	'AUNIP'	mRNA	-1.70251	4.97385e-23
55159	'RFWD3'	mRNA	-0.715697	5.04249e-23
10437	'IFI30'	mRNA	0.662928	5.42144e-23
64855	'NIBAN2'	mRNA	0.644229	5.98481e-23
54107	'POLE3'	mRNA	-0.71135	6.48983e-23
7328	'UBE2H'	mRNA	0.599291	9.0836e-23
156	'GRK2'	mRNA	-0.61172	9.53709e-23
23513	'SCRIB'	mRNA	0.762601	1.00632e-22
5982	'RFC2'	mRNA	-1.14827	1.01788e-22
85459	'CEP295'	mRNA	-0.927773	1.12957e-22
8317	'CDC7'	mRNA	-1.13869	1.21335e-22
6523	'SLC5A1'	mRNA	1.19562	1.31218e-22
4495	'MT1G'	mRNA	-0.842314	1.68557e-22
8565	'YARS1'	mRNA	-0.561651	1.77908e-22
7127	'TNFAIP2'	mRNA	0.712537	1.7945e-22
1263	'PLK3'	mRNA	0.982712	2.45214e-22
5902	'RANBP1'	mRNA	-0.608043	3.56636e-22
55075	'UACA'	mRNA	-0.873536	4.26316e-22
81930	'KIF18A'	mRNA	-1.41796	5.99342e-22
5422	'POLA1'	mRNA	-0.895738	6.78186e-22
5984	'RFC4'	mRNA	-1.06367	7.05744e-22
5111	'PCNA'	mRNA	-0.576206	8.56808e-22
6850	'SYK'	mRNA	0.552506	9.61043e-22
10723	'SLC12A7'	mRNA	0.610067	1.02753e-21
56997	'COQ8A'	mRNA	0.678526	1.14634e-21
26263	'FBXO22'	mRNA	0.772928	1.22769e-21
6282	'S100A11'	mRNA	0.763113	1.32773e-21
84318	'CCDC77'	mRNA	-1.32414	1.44414e-21
79080	'CCDC86'	mRNA	0.680469	1.76133e-21
8714	'ABCC3'	mRNA	0.638558	1.78836e-21
3182	'HNRNPAB'	mRNA	-0.523216	1.91901e-21
7779	'SLC30A1'	mRNA	0.814108	1.96321e-21
39	'ACAT2'	mRNA	-0.734067	2.33795e-21
833	'CARS1'	mRNA	-0.633359	4.25587e-21
729533	'FAM72A'	mRNA	-1.70466	4.45983e-21
1800	'DPEP1'	mRNA	-0.557525	4.69417e-21
1019	'CDK4'	mRNA	-0.562257	5.16006e-21
4680	'CEACAM6'	mRNA	0.5373	5.41955e-21
113791	'PIK3IP1'	mRNA	0.831838	8.83105e-21
9540	'TP53I3'	mRNA	0.946846	9.29039e-21
1743	'DLST'	mRNA	-0.548393	1.01406e-20
23225	'NUP210'	mRNA	-0.724053	1.28667e-20
8061	'FOSL1'	mRNA	0.742058	1.40657e-20
3930	'LBR'	mRNA	-0.616386	2.09926e-20
5981	'RFC1'	mRNA	-0.651991	2.16334e-20
27111	'SDCBP2'	mRNA	1.15479	2.32243e-20
2805	'GOT1'	mRNA	-0.654427	2.33146e-20
64858	'DCLRE1B'	mRNA	-1.2124	2.44328e-20
23594	'ORC6'	mRNA	-1.36037	2.57169e-20
54058	'C21orf58'	mRNA	-1.31151	3.22987e-20
85302	'FBF1'	mRNA	-1.02774	3.37131e-20
220042	'DDIAS'	mRNA	-1.2162	3.76026e-20
240	'ALOX5'	mRNA	1.09402	3.95331e-20
7726	'TRIM26'	mRNA	0.533304	4.20284e-20
85315	'PAQR8'	mRNA	0.651488	4.34232e-20
147015	'DHRS13'	mRNA	-0.954349	4.34462e-20
633	'BGN'	mRNA	-0.656013	5.25134e-20
11118	'BTN3A2'	mRNA	0.930984	9.00924e-20
8805	'TRIM24'	mRNA	0.809243	1.43427e-19
3728	'JUP'	mRNA	0.561774	1.45186e-19
11339	'OIP5'	mRNA	-1.17302	1.49576e-19
84296	'GINS4'	mRNA	-1.30525	1.55241e-19
5468	'PPARG'	mRNA	-0.642526	1.61338e-19
8334	'H2AC6'	mRNA	1.58349	1.6292e-19
10263	'CDK2AP2'	mRNA	-0.688554	1.65996e-19
994	'CDC25B'	mRNA	0.588463	1.80376e-19
23224	'SYNE2'	mRNA	-0.848797	2.09227e-19
11340	'EXOSC8'	mRNA	-0.95256	2.09238e-19
6301	'SARS1'	mRNA	-0.557845	2.09238e-19
652	'BMP4'	mRNA	0.48199	2.10155e-19
8614	'STC2'	mRNA	-0.861724	2.20154e-19
10426	'TUBGCP3'	mRNA	-0.753634	2.36634e-19
84189	'SLITRK6'	mRNA	-1.00881	2.65251e-19
65057	'ACD'	mRNA	-0.897465	2.88015e-19
4430	'MYO1B'	mRNA	0.584772	3.41159e-19
9274	'BCL7C'	mRNA	-0.657229	4.18874e-19
639	'PRDM1'	mRNA	1.29947	4.19385e-19
3726	'JUNB'	mRNA	0.565392	4.77566e-19
10608	'MXD4'	mRNA	0.687874	4.87644e-19
200958	'MUC20'	mRNA	0.867714	5.79402e-19
195828	'ZNF367'	mRNA	-1.2518	6.61351e-19
1066	'CES1'	mRNA	3.40543	8.77958e-19
91010	'FMNL3'	mRNA	-1.24139	8.84341e-19
8833	'GMPS'	mRNA	-0.591839	9.10317e-19
23464	'GCAT'	mRNA	-0.624984	1.19176e-18
64425	'POLR1E'	mRNA	-0.867782	1.28702e-18
79713	'IGFLR1'	mRNA	-1.47175	1.45409e-18
10625	'IVNS1ABP'	mRNA	-0.574657	1.45462e-18
5496	'PPM1G'	mRNA	-0.540831	1.48466e-18
1509	'CTSD'	mRNA	0.525565	1.52373e-18
2673	'GFPT1'	mRNA	-0.616639	1.6107e-18
83695	'RHNO1'	mRNA	-0.939531	2.00566e-18
4141	'MARS1'	mRNA	-0.530726	2.00841e-18
4172	'MCM3'	mRNA	-0.519123	2.01942e-18
6277	'S100A6'	mRNA	0.684275	2.08024e-18
3157	'HMGCS1'	mRNA	-0.604785	2.94551e-18
10874	'NMU'	mRNA	-0.810673	3.11188e-18
6389	'SDHA'	mRNA	-0.500925	3.45324e-18
1643	'DDB2'	mRNA	0.637715	3.87891e-18
55329	'MNS1'	mRNA	-2.01931	4.15655e-18
10929	'SRSF8'	mRNA	0.688383	4.34612e-18
94234	'FOXQ1'	mRNA	0.715252	4.58139e-18
2870	'GRK6'	mRNA	-0.663195	4.8751e-18
53944	'CSNK1G1'	mRNA	0.814207	4.92272e-18
1054	'CEBPG'	mRNA	-0.689897	4.93095e-18
55572	'FOXRED1'	mRNA	-0.680095	5.13737e-18
57530	'CGN'	mRNA	0.753258	5.41529e-18
55764	'IFT122'	mRNA	-0.966828	6.02439e-18
6560	'SLC12A4'	mRNA	0.932124	6.16238e-18
201725	'C4orf46'	mRNA	-1.10857	6.26234e-18
51053	'GMNN'	mRNA	-0.830737	6.78214e-18
1969	'EPHA2'	mRNA	0.591635	7.04426e-18
51321	'AMZ2'	mRNA	0.686945	7.16306e-18
6749	'SSRP1'	mRNA	-0.503649	7.185e-18
54908	'SPDL1'	mRNA	-0.943357	7.87581e-18
143162	'FRMPD2'	mRNA	2.20255	8.27487e-18
8531	'YBX3'	mRNA	0.563363	8.51479e-18
2030	'SLC29A1'	mRNA	-0.619796	8.80111e-18
5634	'PRPS2'	mRNA	-0.59652	8.80111e-18
3146	'HMGB1'	mRNA	-0.556971	9.17698e-18
79098	'C1orf116'	mRNA	0.697111	1.0681e-17
2512	'FTL'	mRNA	0.461979	1.14277e-17
54626	'HES2'	mRNA	1.49388	1.18625e-17
3312	'HSPA8'	mRNA	-0.497087	1.20914e-17
6713	'SQLE'	mRNA	-0.592347	1.21307e-17
57658	'CALCOCO1'	mRNA	0.610725	1.3137e-17
7516	'XRCC2'	mRNA	-1.41856	1.43502e-17
9914	'ATP2C2'	mRNA	-0.624521	1.55824e-17
7517	'XRCC3'	mRNA	-0.875868	1.7174e-17
57016	'AKR1B10'	mRNA	1.53896	1.81331e-17
10541	'ANP32B'	mRNA	-0.643402	1.84223e-17
7014	'TERF2'	mRNA	0.723564	1.86054e-17
54069	'MIS18A'	mRNA	-0.996915	1.90881e-17
10957	'PNRC1'	mRNA	0.635257	1.92853e-17
3615	'IMPDH2'	mRNA	-0.582782	2.02442e-17
170689	'ADAMTS15'	mRNA	-1.35685	2.24024e-17
4502	'MT2A'	mRNA	-0.63805	2.49063e-17
2058	'EPRS1'	mRNA	-0.48341	2.81962e-17
201161	'CENPV'	mRNA	-0.739552	3.06562e-17
29015	'SLC43A3'	mRNA	-0.939153	3.25967e-17
7494	'XBP1'	mRNA	-0.478908	3.33127e-17
113828	'FAM83F'	mRNA	0.804157	3.50541e-17
55706	'NDC1'	mRNA	-0.674749	3.50541e-17
10223	'GPA33'	mRNA	-0.49221	3.59346e-17
548593	'SLX1A'	mRNA	-0.685209	3.62554e-17
4439	'MSH5'	mRNA	-0.853905	3.85802e-17
1718	'DHCR24'	mRNA	-0.510823	4.43352e-17
6117	'RPA1'	mRNA	-0.599417	4.46279e-17
10572	'SIVA1'	mRNA	-0.652071	4.50161e-17
79866	'BORA'	mRNA	-1.02374	4.64563e-17
134147	'CMBL'	mRNA	0.690453	4.83457e-17
25788	'RAD54B'	mRNA	-0.986176	4.85659e-17
55166	'CENPQ'	mRNA	-1.53443	5.46938e-17
107987276	'LOC107987276'	mRNA	1.09239	5.80883e-17
1374	'CPT1A'	mRNA	0.590876	6.2395e-17
6118	'RPA2'	mRNA	-0.780756	6.46125e-17
142	'PARP1'	mRNA	-0.462837	6.72648e-17
28227	'PPP2R3B'	mRNA	-0.943884	6.75048e-17
54982	'CLN6'	mRNA	-0.734319	7.01455e-17
64094	'SMOC2'	mRNA	-0.562841	7.81483e-17
900	'CCNG1'	mRNA	0.534167	8.37493e-17
355	'FAS'	mRNA	0.951972	8.66065e-17
55722	'CEP72'	mRNA	-0.940526	8.72475e-17
1048	'CEACAM5'	mRNA	0.482648	8.85452e-17
954	'ENTPD2'	mRNA	-0.548229	9.8035e-17
254552	'NUDT8'	mRNA	-0.806118	9.99362e-17
7015	'TERT'	mRNA	-1.57877	1.05196e-16
84838	'ZNF496'	mRNA	-0.692258	1.22788e-16
84885	'ZDHHC12'	mRNA	-0.575201	1.25716e-16
79173	'C19orf57'	mRNA	-1.13861	1.30557e-16
1824	'DSC2'	mRNA	0.576309	1.35336e-16
55890	'GPRC5C'	mRNA	0.637846	1.46353e-16
57801	'HES4'	mRNA	-0.719104	1.51221e-16
55705	'IPO9'	mRNA	-0.539941	1.57436e-16
5998	'RGS3'	mRNA	-0.759645	1.63322e-16
81691	'REXO5'	mRNA	-1.34235	1.67529e-16
1633	'DCK'	mRNA	-0.728874	1.93292e-16
60401	'EDA2R'	mRNA	3.30434	1.93742e-16
83596	'BCL2L12'	mRNA	-0.851765	1.95899e-16
2178	'FANCE'	mRNA	-0.928783	2.11272e-16
54780	'NSMCE4A'	mRNA	-0.73327	2.24013e-16
7079	'TIMP4'	mRNA	-1.21792	2.42986e-16
7027	'TFDP1'	mRNA	-0.492644	2.60899e-16
57169	'ZNFX1'	mRNA	0.758338	2.65896e-16
10459	'MAD2L2'	mRNA	-0.845505	2.99871e-16
57701	'NCKAP5L'	mRNA	0.76096	3.00179e-16
27338	'UBE2S'	mRNA	-0.555421	3.13981e-16
10346	'TRIM22'	mRNA	1.4791	3.94065e-16
182	'JAG1'	mRNA	0.627312	4.23769e-16
11260	'XPOT'	mRNA	-0.515374	4.47155e-16
144455	'E2F7'	mRNA	-0.974475	4.63943e-16
11051	'NUDT21'	mRNA	-0.512393	4.76964e-16
64946	'CENPH'	mRNA	-1.07121	4.76964e-16
6319	'SCD'	mRNA	-0.569012	5.00947e-16
201501	'ZBTB7C'	mRNA	0.912168	5.23734e-16
80346	'REEP4'	mRNA	-0.579446	5.75381e-16
10938	'EHD1'	mRNA	0.582819	6.18884e-16
2872	'MKNK2'	mRNA	0.584471	6.26878e-16
10613	'ERLIN1'	mRNA	-0.690198	6.51658e-16
25914	'RTTN'	mRNA	-1.16487	6.57138e-16
4245	'MGAT1'	mRNA	0.532001	6.99497e-16
57122	'NUP107'	mRNA	-0.755664	7.26166e-16
18	'ABAT'	mRNA	0.758425	7.47641e-16
7374	'UNG'	mRNA	-0.678843	7.86741e-16
64114	'TMBIM1'	mRNA	0.536566	8.21485e-16
122953	'JDP2'	mRNA	-0.710271	8.98351e-16
6612	'SUMO3'	mRNA	-0.508111	9.61413e-16
8458	'TTF2'	mRNA	-0.88857	1.05161e-15
79869	'CPSF7'	mRNA	-0.571849	1.09653e-15
54567	'DLL4'	mRNA	-0.802894	1.19069e-15
80023	'NRSN2'	mRNA	-0.741763	1.20361e-15
1032	'CDKN2D'	mRNA	-1.15682	1.21151e-15
150696	'PROM2'	mRNA	0.637834	1.28457e-15
805	'CALM2'	mRNA	-0.605739	1.35103e-15
5831	'PYCR1'	mRNA	-0.446778	1.40889e-15
64770	'CCDC14'	mRNA	-0.603214	1.49444e-15
388115	'CCDC9B'	mRNA	0.811768	1.56641e-15
83667	'SESN2'	mRNA	0.623665	1.59569e-15
55320	'MIS18BP1'	mRNA	-0.875995	1.83205e-15
162681	'C18orf54'	mRNA	-1.71684	1.92077e-15
2746	'GLUD1'	mRNA	-0.500734	1.99313e-15
80152	'CENPT'	mRNA	-0.650474	3.09247e-15
2036	'EPB41L1'	mRNA	0.796777	3.14931e-15
9126	'SMC3'	mRNA	-0.593662	3.17687e-15
154091	'SLC2A12'	mRNA	0.851378	3.35319e-15
10243	'GPHN'	mRNA	-0.659937	3.5608e-15
55362	'TMEM63B'	mRNA	0.568493	3.57803e-15
282991	'BLOC1S2'	mRNA	0.774933	3.69327e-15
79188	'TMEM43'	mRNA	0.518966	3.77108e-15
58476	'TP53INP2'	mRNA	0.883763	3.99442e-15
85377	'MICALL1'	mRNA	0.58314	4.09145e-15
91289	'LMF2'	mRNA	-0.550671	4.13093e-15
57095	'PITHD1'	mRNA	-0.646282	4.13994e-15
6275	'S100A4'	mRNA	1.05591	4.5695e-15
3837	'KPNB1'	mRNA	-0.474125	4.74551e-15
90557	'CCDC74A'	mRNA	-0.912498	5.01875e-15
9601	'PDIA4'	mRNA	-0.466407	5.6393e-15
2709	'GJB5'	mRNA	1.49568	5.8053e-15
11186	'RASSF1'	mRNA	-0.814393	6.04986e-15
5236	'PGM1'	mRNA	-0.716576	6.22196e-15
6778	'STAT6'	mRNA	0.472913	6.22917e-15
2040	'STOM'	mRNA	1.6272	6.55722e-15
340485	'ACER2'	mRNA	1.04952	6.59201e-15
54991	'C1orf159'	mRNA	-0.660124	6.86083e-15
9184	'BUB3'	mRNA	-0.496747	7.87042e-15
2224	'FDPS'	mRNA	-0.514366	7.90177e-15
27316	'RBMX'	mRNA	-0.436266	8.90678e-15
4811	'NID1'	mRNA	-0.715073	9.59995e-15
649238	'PNMA6E'	mRNA	-0.782377	9.72771e-15
1196	'CLK2'	mRNA	-0.625783	1.01465e-14
25946	'ZNF385A'	mRNA	0.844647	1.02862e-14
2355	'FOSL2'	mRNA	0.620756	1.05763e-14
144811	'LACC1'	mRNA	0.959448	1.08115e-14
5650	'KLK7'	mRNA	1.17677	1.10807e-14
401541	'CENPP'	mRNA	-1.22597	1.13272e-14
9969	'MED13'	mRNA	0.636889	1.23537e-14
2817	'GPC1'	mRNA	0.628412	1.26656e-14
54578	'UGT1A6'	mRNA	0.762812	1.34724e-14
10961	'ERP29'	mRNA	-0.485679	1.37838e-14
23589	'CARHSP1'	mRNA	-0.640845	1.46118e-14
4201	'MEA1'	mRNA	-0.632395	1.64423e-14
10055	'SAE1'	mRNA	-0.537785	1.75032e-14
4603	'MYBL1'	mRNA	-1.58988	1.8229e-14
55638	'SYBU'	mRNA	0.607909	2.03652e-14
84918	'LRP11'	mRNA	-0.665818	2.14375e-14
81931	'ZNF93'	mRNA	-1.27539	2.2248e-14
55125	'CEP192'	mRNA	-0.732613	2.23582e-14
578	'BAK1'	mRNA	0.607704	2.24491e-14
2118	'ETV4'	mRNA	-0.490071	2.28787e-14
5166	'PDK4'	mRNA	1.78978	2.32628e-14
151011	'SEPTIN10'	mRNA	-0.541172	2.52338e-14
56262	'LRRC8A'	mRNA	0.649566	2.6043e-14
5425	'POLD2'	mRNA	-0.45329	2.65049e-14
27341	'RRP7A'	mRNA	-0.524315	2.69037e-14
23245	'ASTN2'	mRNA	1.01461	2.72644e-14
5429	'POLH'	mRNA	0.684229	2.74977e-14
5892	'RAD51D'	mRNA	-1.13259	2.74977e-14
55502	'HES6'	mRNA	-0.538666	2.8669e-14
26579	'MYEOV'	mRNA	0.790668	2.88459e-14
4496	'MT1H'	mRNA	-1.41362	3.17083e-14
221833	'SP8'	mRNA	-0.906504	3.30073e-14
51222	'ZNF219'	mRNA	0.634459	3.4599e-14
10112	'KIF20A'	mRNA	-0.902869	4.6339e-14
84300	'UQCC2'	mRNA	-0.718457	4.71293e-14
79863	'RBFA'	mRNA	-0.80461	4.74738e-14
51517	'NCKIPSD'	mRNA	-0.53068	4.92744e-14
65083	'NOL6'	mRNA	0.585708	5.2467e-14
4013	'VWA5A'	mRNA	0.788892	5.34318e-14
10120	'ACTR1B'	mRNA	-0.555085	5.47908e-14
387103	'CENPW'	mRNA	-1.05805	5.9548e-14
55765	'INAVA'	mRNA	0.590503	6.00024e-14
54716	'SLC6A20'	mRNA	0.592112	6.27388e-14
9448	'MAP4K4'	mRNA	0.498128	6.90072e-14
27035	'NOX1'	mRNA	-1.17108	7.31463e-14
25932	'CLIC4'	mRNA	-0.598375	7.64616e-14
81619	'TSPAN14'	mRNA	0.515274	7.7772e-14
1652	'DDT'	mRNA	-0.554547	7.86324e-14
81607	'NECTIN4'	mRNA	1.07409	8.76579e-14
27165	'GLS2'	mRNA	0.670593	9.84374e-14
1515	'CTSV'	mRNA	-0.97308	9.86177e-14
79894	'ZNF672'	mRNA	0.562427	1.00272e-13
1200	'TPP1'	mRNA	0.53748	1.01638e-13
91057	'CCDC34'	mRNA	-0.763228	1.34079e-13
53371	'NUP54'	mRNA	-0.642717	1.50344e-13
55924	'INKA2'	mRNA	1.11117	1.50344e-13
64129	'TINAGL1'	mRNA	0.506193	1.72479e-13
55671	'PPP4R3A'	mRNA	0.540775	1.942e-13
7515	'XRCC1'	mRNA	-0.583898	2.18955e-13
9766	'SUSD6'	mRNA	0.911869	2.60835e-13
57715	'SEMA4G'	mRNA	0.593448	2.62388e-13
56204	'FAM214A'	mRNA	0.962548	2.81248e-13
1831	'TSC22D3'	mRNA	-0.8782	3.08926e-13
2119	'ETV5'	mRNA	-0.67574	3.20403e-13
51043	'ZBTB7B'	mRNA	0.492442	3.31498e-13
55034	'MOCOS'	mRNA	-0.701748	3.57911e-13
79581	'SLC52A2'	mRNA	0.44984	3.8973e-13
84687	'PPP1R9B'	mRNA	0.54334	3.90286e-13
149603	'RNF187'	mRNA	-0.4447	4.09487e-13
4900	'NRGN'	mRNA	-1.19943	4.16282e-13
26471	'NUPR1'	mRNA	-0.642647	4.2081e-13
79672	'FN3KRP'	mRNA	-0.677274	4.27645e-13
384	'ARG2'	mRNA	-0.857332	4.4103e-13
64065	'PERP'	mRNA	0.482983	4.49419e-13
7156	'TOP3A'	mRNA	-0.595415	4.96102e-13
3156	'HMGCR'	mRNA	-0.484542	5.0185e-13
2744	'GLS'	mRNA	0.668067	5.30094e-13
8733	'GPAA1'	mRNA	-0.45699	5.51154e-13
4597	'MVD'	mRNA	-0.556911	5.67432e-13
5034	'P4HB'	mRNA	-0.41331	5.67432e-13
9060	'PAPSS2'	mRNA	-0.597594	5.67908e-13
90835	'CCDC189'	mRNA	-1.18719	5.67908e-13
4047	'LSS'	mRNA	-0.478981	5.726e-13
5528	'PPP2R5D'	mRNA	0.464972	5.72609e-13
10602	'CDC42EP3'	mRNA	0.716046	6.16374e-13
1845	'DUSP3'	mRNA	0.564591	6.16374e-13
113278	'SLC52A3'	mRNA	0.609395	6.45076e-13
55627	'SMPD4'	mRNA	-0.475188	6.90926e-13
7533	'YWHAH'	mRNA	-0.477537	6.957e-13
29920	'PYCR2'	mRNA	-0.478294	7.55804e-13
374	'AREG'	mRNA	0.535456	7.55804e-13
23670	'CEMIP2'	mRNA	0.468955	7.55996e-13
84823	'LMNB2'	mRNA	-0.530504	7.57324e-13
3795	'KHK'	mRNA	-0.770692	7.68358e-13
55861	'DBNDD2'	mRNA	-0.519733	7.7252e-13
25888	'ZNF473'	mRNA	-0.8224	7.85315e-13
5116	'PCNT'	mRNA	-0.631415	8.49053e-13
7923	'HSD17B8'	mRNA	-0.815298	9.63553e-13
23650	'TRIM29'	mRNA	0.909661	1.00901e-12
80010	'RMI1'	mRNA	-0.888874	1.01838e-12
25865	'PRKD2'	mRNA	0.545245	1.05272e-12
55367	'PIDD1'	mRNA	0.610979	1.10036e-12
9662	'CEP135'	mRNA	-1.16105	1.10818e-12
10657	'KHDRBS1'	mRNA	-0.409186	1.14255e-12
51454	'GULP1'	mRNA	0.844276	1.18178e-12
64793	'CEP85'	mRNA	-0.611905	1.18431e-12
5365	'PLXNB3'	mRNA	0.752717	1.27038e-12
1478	'CSTF2'	mRNA	-0.494738	1.27573e-12
55154	'MSTO1'	mRNA	-0.61873	1.29313e-12
55011	'PIH1D1'	mRNA	-0.553033	1.31465e-12
79720	'VPS37B'	mRNA	0.48617	1.4518e-12
80263	'TRIM45'	mRNA	-1.40441	1.4518e-12
7422	'VEGFA'	mRNA	-0.586007	1.46941e-12
10045	'SH2D3A'	mRNA	0.582459	1.52292e-12
51060	'TXNDC12'	mRNA	-0.553677	1.55923e-12
81611	'ANP32E'	mRNA	-0.546703	1.58694e-12
283149	'BCL9L'	mRNA	0.641436	1.60209e-12
256949	'KANK3'	mRNA	1.81895	1.66082e-12
5928	'RBBP4'	mRNA	-0.425305	1.70815e-12
9415	'FADS2'	mRNA	-0.398536	1.91821e-12
6926	'TBX3'	mRNA	0.506156	2.09543e-12
79695	'GALNT12'	mRNA	-0.832317	2.14214e-12
26233	'FBXL6'	mRNA	-0.560068	2.26661e-12
79001	'VKORC1'	mRNA	-0.562447	2.3112e-12
91039	'DPP9'	mRNA	0.556978	2.38988e-12
6626	'SNRPA'	mRNA	-0.417882	2.439e-12
6659	'SOX4'	mRNA	0.515638	2.53407e-12
57402	'S100A14'	mRNA	0.361703	2.67576e-12
50809	'HP1BP3'	mRNA	-0.447701	2.81573e-12
85439	'STON2'	mRNA	1.5476	2.87059e-12
23623	'RUSC1'	mRNA	-0.5274	2.87585e-12
622	'BDH1'	mRNA	-0.617608	2.95824e-12
494514	'TYMSOS'	mRNA	1.3475	2.98457e-12
55183	'RIF1'	mRNA	-0.580541	2.98457e-12
55972	'SLC25A40'	mRNA	-0.791991	3.00215e-12
10755	'GIPC1'	mRNA	0.471798	3.07211e-12
348110	'ARPIN'	mRNA	-0.610524	3.07751e-12
116228	'COX20'	mRNA	0.665779	3.11333e-12
91687	'CENPL'	mRNA	-1.60917	3.21552e-12
55719	'SLF2'	mRNA	-0.753756	3.26622e-12
10365	'KLF2'	mRNA	-0.74349	3.28721e-12
4814	'NINJ1'	mRNA	0.572874	3.36022e-12
5912	'RAP2B'	mRNA	0.605698	3.40785e-12
3672	'ITGA1'	mRNA	-0.675419	3.53412e-12
11120	'BTN2A1'	mRNA	1.0853	3.57747e-12
23657	'SLC7A11'	mRNA	-0.631221	3.64012e-12
8520	'HAT1'	mRNA	-0.719751	3.6452e-12
11151	'CORO1A'	mRNA	-0.556528	3.98553e-12
4179	'CD46'	mRNA	-0.450813	4.02167e-12
11313	'LYPLA2'	mRNA	0.421766	4.2129e-12
1033	'CDKN3'	mRNA	-0.612223	4.33995e-12
54475	'NLE1'	mRNA	-0.56447	4.50287e-12
57407	'NMRAL1'	mRNA	-0.496312	4.56798e-12
54947	'LPCAT2'	mRNA	0.748997	4.67636e-12
8558	'CDK10'	mRNA	-0.535407	4.78678e-12
9790	'BMS1'	mRNA	0.472228	4.86431e-12
5789	'PTPRD'	mRNA	-0.830321	4.88287e-12
83544	'DNAL1'	mRNA	0.851911	4.98719e-12
59307	'SIGIRR'	mRNA	-0.467912	5.02654e-12
93129	'ORAI3'	mRNA	0.75226	5.16196e-12
60481	'ELOVL5'	mRNA	-0.482626	5.22583e-12
80071	'CCDC15'	mRNA	-1.79337	5.24885e-12
3843	'IPO5'	mRNA	-0.403697	5.38785e-12
11334	'TUSC2'	mRNA	0.549444	5.51796e-12
5827	'PXMP2'	mRNA	-0.786957	5.845e-12
6533	'SLC6A6'	mRNA	0.676652	5.85835e-12
3866	'KRT15'	mRNA	1.52492	5.86753e-12
56924	'PAK6'	mRNA	-1.80736	6.00496e-12
57820	'CCNB1IP1'	mRNA	-0.656374	6.27181e-12
6790	'AURKA'	mRNA	-0.683217	6.27181e-12
6737	'TRIM21'	mRNA	0.704751	6.54459e-12
94239	'H2AZ2'	mRNA	-0.562544	6.59137e-12
2956	'MSH6'	mRNA	-0.646678	7.12034e-12
151188	'ARL6IP6'	mRNA	-0.785884	7.33243e-12
1104	'RCC1'	mRNA	-0.471789	7.70785e-12
51085	'MLXIPL'	mRNA	-0.637119	7.90384e-12
23165	'NUP205'	mRNA	-0.470676	8.28031e-12
64215	'DNAJC1'	mRNA	-0.558552	8.39856e-12
54502	'RBM47'	mRNA	0.458891	9.29199e-12
54830	'NUP62CL'	mRNA	-1.18579	9.34087e-12
57132	'CHMP1B'	mRNA	0.486617	9.4567e-12
51537	'MTFP1'	mRNA	-0.618029	9.76752e-12
79710	'MORC4'	mRNA	-0.542544	1.01526e-11
5514	'PPP1R10'	mRNA	0.515046	1.11029e-11
10491	'CRTAP'	mRNA	-0.584542	1.1393e-11
51750	'RTEL1'	mRNA	-0.579145	1.15093e-11
84986	'ARHGAP19'	mRNA	-0.946053	1.2891e-11
6793	'STK10'	mRNA	0.635694	1.34949e-11
3020	'H3-3A'	mRNA	-0.447115	1.47606e-11
26031	'OSBPL3'	mRNA	0.57509	1.68089e-11
55561	'CDC42BPG'	mRNA	0.507541	1.71288e-11
84133	'ZNRF3'	mRNA	0.471907	1.724e-11
26071	'RTL8A'	mRNA	0.48235	1.72584e-11
11198	'SUPT16H'	mRNA	-0.460279	1.82193e-11
85444	'LRRCC1'	mRNA	-0.70454	2.04307e-11
586	'BCAT1'	mRNA	-0.469087	2.13436e-11
54676	'GTPBP2'	mRNA	-0.626749	2.22167e-11
201255	'LRRC45'	mRNA	-0.601748	2.2302e-11
376267	'RAB15'	mRNA	-0.455687	2.23249e-11
91947	'ARRDC4'	mRNA	0.755799	2.24745e-11
4609	'MYC'	mRNA	0.439014	2.27458e-11
653820	'FAM72B'	mRNA	-1.40426	2.43075e-11
2634	'GBP2'	mRNA	0.808164	2.46178e-11
57617	'VPS18'	mRNA	0.641147	2.46178e-11
644019	'CBWD6'	mRNA	0.81194	2.5234e-11
2029	'ENSA'	mRNA	-0.434035	2.77612e-11
55422	'ZNF331'	mRNA	-1.35544	2.79467e-11
54897	'CASZ1'	mRNA	0.671802	2.8372e-11
7804	'LRP8'	mRNA	-0.495768	2.85684e-11
51776	'MAP3K20'	mRNA	-0.534765	2.89617e-11
60386	'SLC25A19'	mRNA	-0.739083	2.9475e-11
128272	'ARHGEF19'	mRNA	-0.624048	3.09275e-11
3251	'HPRT1'	mRNA	-0.658806	3.22725e-11
9314	'KLF4'	mRNA	0.503026	3.39707e-11
3185	'HNRNPF'	mRNA	-0.376055	3.54484e-11
63875	'MRPL17'	mRNA	-0.479056	3.66654e-11
7643	'ZNF90'	mRNA	-1.10881	3.76962e-11
678	'ZFP36L2'	mRNA	0.53444	4.33776e-11
5810	'RAD1'	mRNA	-0.834397	4.57316e-11
84901	'NFATC2IP'	mRNA	-0.56709	4.62166e-11
10198	'MPHOSPH9'	mRNA	-0.763689	4.84291e-11
54845	'ESRP1'	mRNA	-0.455953	4.88464e-11
113230	'MISP3'	mRNA	-0.58568	5.05656e-11
440145	'MZT1'	mRNA	-0.754892	5.09534e-11
5931	'RBBP7'	mRNA	-0.450887	5.10625e-11
6541	'SLC7A1'	mRNA	-0.493036	5.23437e-11
79871	'RPAP2'	mRNA	0.535233	5.67871e-11
80256	'FAM214B'	mRNA	0.647513	5.73106e-11
55013	'MCUB'	mRNA	-0.780036	5.75039e-11
26278	'SACS'	mRNA	1.00732	5.75262e-11
28231	'SLCO4A1'	mRNA	0.449081	5.75418e-11
79017	'GGCT'	mRNA	-0.60695	6.07183e-11
1717	'DHCR7'	mRNA	-0.384895	6.16794e-11
334	'APLP2'	mRNA	-0.373099	6.21743e-11
8533	'COPS3'	mRNA	-0.4998	6.34986e-11
283431	'GAS2L3'	mRNA	-0.934567	6.4527e-11
79154	'DHRS11'	mRNA	-0.646476	6.52948e-11
129787	'TMEM18'	mRNA	-0.676669	6.92131e-11
11171	'STRAP'	mRNA	0.434347	7.33234e-11
91107	'TRIM47'	mRNA	-0.567171	8.07009e-11
6520	'SLC3A2'	mRNA	-0.351654	8.1557e-11
7586	'ZKSCAN1'	mRNA	0.506924	8.25401e-11
50650	'ARHGEF3'	mRNA	0.818654	8.27833e-11
79902	'NUP85'	mRNA	-0.552067	8.27833e-11
123	'PLIN2'	mRNA	0.648351	8.46456e-11
84286	'TMEM175'	mRNA	-0.678736	8.67293e-11
10606	'PAICS'	mRNA	-0.400493	8.73983e-11
891	'CCNB1'	mRNA	-0.598144	8.92766e-11
348235	'SKA2'	mRNA	-0.927738	9.02386e-11
80315	'CPEB4'	mRNA	0.868669	9.26472e-11
253714	'MMS22L'	mRNA	-0.81105	9.29696e-11
89796	'NAV1'	mRNA	0.68432	9.33031e-11
114881	'OSBPL7'	mRNA	0.524011	9.6946e-11
26020	'LRP10'	mRNA	0.396519	1.02025e-10
9263	'STK17A'	mRNA	0.704812	1.03353e-10
5558	'PRIM2'	mRNA	-0.86924	1.05385e-10
6715	'SRD5A1'	mRNA	-0.551656	1.07865e-10
4163	'MCC'	mRNA	1.17531	1.12879e-10
23176	'SEPTIN8'	mRNA	-0.454732	1.13421e-10
115106	'HAUS1'	mRNA	-0.719385	1.14557e-10
9894	'TELO2'	mRNA	-0.571549	1.14834e-10
59353	'TMEM35A'	mRNA	-0.810608	1.15393e-10
65003	'MRPL11'	mRNA	-0.462768	1.16554e-10
286826	'LIN9'	mRNA	-0.886372	1.17232e-10
6502	'SKP2'	mRNA	-0.55706	1.21859e-10
81	'ACTN4'	mRNA	0.362402	1.25951e-10
150209	'AIFM3'	mRNA	-0.651474	1.27604e-10
3162	'HMOX1'	mRNA	0.978565	1.28179e-10
9656	'MDC1'	mRNA	-0.528383	1.37343e-10
10724	'OGA'	mRNA	0.441397	1.37425e-10
4968	'OGG1'	mRNA	-0.700217	1.37642e-10
55970	'GNG12'	mRNA	0.489914	1.39521e-10
84321	'THOC3'	mRNA	-0.407543	1.40668e-10
57535	'ELAPOR1'	mRNA	-0.822061	1.41223e-10
4668	'NAGA'	mRNA	-0.59071	1.47713e-10
389816	'LRRC26'	mRNA	-0.601003	1.49805e-10
6536	'SLC6A9'	mRNA	-0.758316	1.51996e-10
28992	'MACROD1'	mRNA	-0.526934	1.5526e-10
80764	'THAP7'	mRNA	-0.562019	1.58212e-10
9064	'MAP3K6'	mRNA	-0.733748	1.60621e-10
256987	'SERINC5'	mRNA	0.564439	1.63484e-10
214	'ALCAM'	mRNA	0.373095	1.65853e-10
126432	'RINL'	mRNA	0.724472	1.66496e-10
10131	'TRAP1'	mRNA	-0.387258	1.68019e-10
10628	'TXNIP'	mRNA	1.03182	1.69922e-10
90390	'MED30'	mRNA	-0.766067	1.73218e-10
55893	'ZNF395'	mRNA	-0.469468	1.74649e-10
135112	'NCOA7'	mRNA	-0.586341	1.75295e-10
5228	'PGF'	mRNA	2.42282	1.75295e-10
11064	'CNTRL'	mRNA	-0.688665	1.76872e-10
399665	'FAM102A'	mRNA	0.478036	1.7858e-10
10189	'ALYREF'	mRNA	-0.567816	1.80071e-10
26256	'CABYR'	mRNA	2.79982	1.9062e-10
83719	'YPEL3'	mRNA	0.58612	1.92299e-10
353132	'LCE1B'	mRNA	3.79422	1.97216e-10
2887	'GRB10'	mRNA	-0.539161	1.97681e-10
7150	'TOP1'	mRNA	0.397393	1.97681e-10
83660	'TLN2'	mRNA	-0.489793	2.06529e-10
10383	'TUBB4B'	mRNA	-0.486255	2.0995e-10
55010	'PARPBP'	mRNA	-0.705945	2.11887e-10
10465	'PPIH'	mRNA	-0.618068	2.15986e-10
6901	'TAZ'	mRNA	-0.577944	2.18127e-10
10130	'PDIA6'	mRNA	-0.394387	2.21675e-10
444882	'IGFL4'	mRNA	0.561886	2.41467e-10
4361	'MRE11'	mRNA	-0.852665	2.45844e-10
55088	'CCDC186'	mRNA	0.599604	2.54189e-10
1045	'CDX2'	mRNA	0.457901	2.70169e-10
56731	'SLC2A4RG'	mRNA	-0.44302	2.75237e-10
8204	'NRIP1'	mRNA	0.567115	2.76672e-10
3291	'HSD11B2'	mRNA	0.593055	2.89941e-10
10989	'IMMT'	mRNA	-0.395619	2.93699e-10
23193	'GANAB'	mRNA	-0.358475	3.05236e-10
647024	'C6orf132'	mRNA	0.705221	3.05236e-10
121268	'RHEBL1'	mRNA	-1.77644	3.09513e-10
121441	'NEDD1'	mRNA	-0.632792	3.09513e-10
2176	'FANCC'	mRNA	-0.71562	3.16276e-10
79007	'DBNDD1'	mRNA	0.446239	3.26174e-10
387521	'TMEM189'	mRNA	0.540166	3.28486e-10
79792	'GSDMD'	mRNA	-0.528297	3.44033e-10
145508	'CEP128'	mRNA	-1.15042	3.51198e-10
54884	'RETSAT'	mRNA	0.446018	3.6522e-10
50487	'PLA2G3'	mRNA	-0.602319	3.70234e-10
6136	'RPL12'	mRNA	-0.370058	3.7514e-10
10904	'BLCAP'	mRNA	0.500476	3.9558e-10
7453	'WARS1'	mRNA	-0.430975	4.01957e-10
9747	'TCAF1'	mRNA	-0.460215	4.11316e-10
27134	'TJP3'	mRNA	0.430991	4.14986e-10
3631	'INPP4A'	mRNA	0.696469	4.35065e-10
10241	'CALCOCO2'	mRNA	-0.487097	4.44027e-10
6119	'RPA3'	mRNA	-0.78683	4.46781e-10
71	'ACTG1'	mRNA	-0.339509	4.50787e-10
440275	'EIF2AK4'	mRNA	0.485613	4.51688e-10
26232	'FBXO2'	mRNA	1.02635	4.55632e-10
23279	'NUP160'	mRNA	-0.509807	4.55672e-10
3033	'HADH'	mRNA	-0.422413	4.67025e-10
83742	'MARVELD1'	mRNA	0.571092	4.68403e-10
2195	'FAT1'	mRNA	0.511569	4.70189e-10
343099	'CCDC18'	mRNA	-1.04956	4.80189e-10
153090	'DAB2IP'	mRNA	0.471059	4.85046e-10
26586	'CKAP2'	mRNA	-0.520096	5.00819e-10
339122	'RAB43'	mRNA	0.630104	5.35335e-10
9260	'PDLIM7'	mRNA	-0.477559	5.63435e-10
6988	'TCTA'	mRNA	0.546161	5.66952e-10
4091	'SMAD6'	mRNA	0.639191	5.89546e-10
8861	'LDB1'	mRNA	0.388481	6.36164e-10
10614	'HEXIM1'	mRNA	0.52822	6.37607e-10
2523	'FUT1'	mRNA	-0.886174	6.6341e-10
55506	'MACROH2A2'	mRNA	-0.486834	6.82813e-10
55049	'REX1BD'	mRNA	-0.476443	6.98604e-10
7301	'TYRO3'	mRNA	-0.657259	6.99798e-10
4700	'NDUFA6'	mRNA	-0.474525	7.00397e-10
55152	'DALRD3'	mRNA	-0.623112	7.29245e-10
2055	'CLN8'	mRNA	0.882431	7.2979e-10
89849	'ATG16L2'	mRNA	-0.703372	7.2979e-10
23474	'ETHE1'	mRNA	-0.418904	7.46774e-10
22822	'PHLDA1'	mRNA	0.417098	7.73616e-10
1573	'CYP2J2'	mRNA	-0.624911	8.17599e-10
63826	'SRR'	mRNA	-0.755054	8.53106e-10
80119	'PIF1'	mRNA	-1.12071	8.99583e-10
29950	'SERTAD1'	mRNA	0.813194	9.08265e-10
55300	'PI4K2B'	mRNA	-0.607514	9.26053e-10
11104	'KATNA1'	mRNA	-0.7232	9.32092e-10
9610	'RIN1'	mRNA	0.449493	9.52908e-10
51253	'MRPL37'	mRNA	-0.382254	9.59497e-10
54535	'CCHCR1'	mRNA	-0.552201	9.6053e-10
1606	'DGKA'	mRNA	0.553245	9.6646e-10
9818	'NUP58'	mRNA	-0.524615	9.85823e-10
8407	'TAGLN2'	mRNA	-0.333316	9.8809e-10
5105	'PCK1'	mRNA	-1.71508	9.98349e-10
1119	'CHKA'	mRNA	0.762281	1.00351e-09
9322	'TRIP10'	mRNA	0.398397	1.04692e-09
56172	'ANKH'	mRNA	0.424414	1.08119e-09
11135	'CDC42EP1'	mRNA	-0.438004	1.112e-09
9057	'SLC7A6'	mRNA	0.585971	1.22325e-09
3694	'ITGB6'	mRNA	0.710515	1.24068e-09
10814	'CPLX2'	mRNA	1.40244	1.27806e-09
91544	'UBXN11'	mRNA	-0.748701	1.30911e-09
2052	'EPHX1'	mRNA	0.394631	1.36978e-09
1649	'DDIT3'	mRNA	-0.913962	1.38931e-09
118932	'ANKRD22'	mRNA	0.715517	1.6119e-09
5631	'PRPS1'	mRNA	-0.60496	1.79757e-09
5050	'PAFAH1B3'	mRNA	-0.42616	1.83992e-09
220869	'CBWD5'	mRNA	0.61414	1.84266e-09
292	'SLC25A5'	mRNA	-0.368055	1.86894e-09
30833	'NT5C'	mRNA	-0.5161	1.8834e-09
116461	'TSEN15'	mRNA	-0.532677	1.88648e-09
1595	'CYP51A1'	mRNA	-0.430626	1.90011e-09
3709	'ITPR2'	mRNA	-0.467084	1.90675e-09
85363	'TRIM5'	mRNA	0.628703	1.97486e-09
3475	'IFRD1'	mRNA	-0.680868	2.05881e-09
5791	'PTPRE'	mRNA	0.419063	2.08477e-09
54540	'FAM193B'	mRNA	-0.477749	2.14368e-09
8915	'BCL10'	mRNA	0.681413	2.15155e-09
442213	'PTCHD4'	mRNA	2.12159	2.16427e-09
10469	'TIMM44'	mRNA	-0.463241	2.23192e-09
144501	'KRT80'	mRNA	0.513405	2.28864e-09
1364	'CLDN4'	mRNA	0.35527	2.47405e-09
9392	'TGFBRAP1'	mRNA	0.487684	2.5222e-09
2017	'CTTN'	mRNA	0.37573	2.66367e-09
51621	'KLF13'	mRNA	0.456064	2.68984e-09
84153	'RNASEH2C'	mRNA	-0.535071	2.7361e-09
148327	'CREB3L4'	mRNA	-0.733704	2.75672e-09
56937	'PMEPA1'	mRNA	0.933455	2.92086e-09
57695	'USP37'	mRNA	-0.757002	2.9894e-09
8819	'SAP30'	mRNA	-0.660831	3.00412e-09
85359	'DGCR6L'	mRNA	-0.511134	3.01038e-09
89839	'ARHGAP11B'	mRNA	-1.64563	3.12094e-09
58493	'INIP'	mRNA	-0.729446	3.13523e-09
116534	'MRGPRE'	mRNA	1.33958	3.14264e-09
26499	'PLEK2'	mRNA	-0.412845	3.1684e-09
1545	'CYP1B1'	mRNA	-1.20899	3.19627e-09
3914	'LAMB3'	mRNA	0.528451	3.21827e-09
79447	'PAGR1'	mRNA	-0.45664	3.23857e-09
54492	'NEURL1B'	mRNA	-0.487699	3.30455e-09
535	'ATP6V0A1'	mRNA	0.42654	3.31679e-09
5052	'PRDX1'	mRNA	0.415529	3.32112e-09
727866	'FAM156B'	mRNA	-0.566354	3.44521e-09
93134	'ZNF561'	mRNA	0.533972	3.57795e-09
55654	'TMEM127'	mRNA	0.467405	3.82541e-09
25987	'TSKU'	mRNA	0.406715	3.83611e-09
9249	'DHRS3'	mRNA	0.670855	3.95986e-09
2588	'GALNS'	mRNA	0.681449	3.96542e-09
9052	'GPRC5A'	mRNA	0.428854	4.30327e-09
8836	'GGH'	mRNA	-0.616277	4.49471e-09
90007	'MIDN'	mRNA	0.480992	4.68399e-09
6628	'SNRPB'	mRNA	-0.360782	4.69886e-09
10902	'BRD8'	mRNA	-0.441633	4.76773e-09
4598	'MVK'	mRNA	-0.487401	4.8397e-09
51768	'TM7SF3'	mRNA	0.367864	4.94933e-09
10090	'UST'	mRNA	-0.569687	4.99901e-09
402	'ARL2'	mRNA	-0.379413	5.21885e-09
26150	'RIBC2'	mRNA	-2.14245	5.22627e-09
60491	'NIF3L1'	mRNA	-0.577036	5.29842e-09
80736	'SLC44A4'	mRNA	0.437778	5.6721e-09
29785	'CYP2S1'	mRNA	0.407294	5.90201e-09
50614	'GALNT9'	mRNA	-1.05394	5.90201e-09
55191	'NADSYN1'	mRNA	0.423781	5.98721e-09
1982	'EIF4G2'	mRNA	0.3164	6.19166e-09
57491	'AHRR'	mRNA	-0.517848	6.50617e-09
55086	'RADX'	mRNA	-0.904246	6.57087e-09
26993	'AKAP8L'	mRNA	0.494099	7.04755e-09
27235	'COQ2'	mRNA	-0.724465	7.12076e-09
113220	'KIF12'	mRNA	-1.34266	7.41056e-09
1825	'DSC3'	mRNA	1.3111	7.49915e-09
23130	'ATG2A'	mRNA	0.532132	7.53948e-09
5834	'PYGB'	mRNA	0.344124	7.56584e-09
364	'AQP7'	mRNA	1.289	7.86505e-09
25841	'ABTB2'	mRNA	0.806508	7.98453e-09
57619	'SHROOM3'	mRNA	0.454354	8.32697e-09
84314	'TMEM107'	mRNA	-0.773265	8.33084e-09
4329	'ALDH6A1'	mRNA	-0.631032	8.43994e-09
10994	'ILVBL'	mRNA	-0.449417	8.51506e-09
6732	'SRPK1'	mRNA	-0.386301	8.63553e-09
7415	'VCP'	mRNA	0.354484	8.77808e-09
55055	'ZWILCH'	mRNA	-0.726737	8.98171e-09
6434	'TRA2B'	mRNA	-0.357451	9.06394e-09
5371	'PML'	mRNA	0.474113	9.22069e-09
353135	'LCE1E'	mRNA	2.13355	9.63617e-09
587	'BCAT2'	mRNA	-0.440364	9.70014e-09
22838	'RNF44'	mRNA	0.55336	9.7103e-09
393	'ARHGAP4'	mRNA	-0.454966	9.92814e-09
10527	'IPO7'	mRNA	-0.406592	1.01148e-08
375248	'ANKRD36'	mRNA	-0.839776	1.01148e-08
2876	'GPX1'	mRNA	0.402679	1.02004e-08
3841	'KPNA5'	mRNA	0.492994	1.02119e-08
57050	'UTP3'	mRNA	0.5713	1.04492e-08
126374	'WTIP'	mRNA	1.85776	1.05235e-08
3315	'HSPB1'	mRNA	0.408007	1.07576e-08
1632	'ECI1'	mRNA	-0.448289	1.14558e-08
54453	'RIN2'	mRNA	0.773848	1.14884e-08
80279	'CDK5RAP3'	mRNA	-0.405576	1.18405e-08
643338	'C15orf62'	mRNA	1.69073	1.18606e-08
10181	'RBM5'	mRNA	-0.417516	1.19069e-08
4357	'MPST'	mRNA	-0.443036	1.19736e-08
65062	'TMEM237'	mRNA	-0.911103	1.20309e-08
79979	'TRMT2B'	mRNA	-0.589204	1.22814e-08
81928	'CABLES2'	mRNA	-0.648011	1.23185e-08
116844	'LRG1'	mRNA	0.548481	1.2593e-08
23046	'KIF21B'	mRNA	-0.476656	1.26134e-08
283991	'UBALD2'	mRNA	-0.39841	1.28167e-08
342184	'FMN1'	mRNA	1.05309	1.28167e-08
2635	'GBP3'	mRNA	0.609598	1.30565e-08
10456	'HAX1'	mRNA	-0.387327	1.32207e-08
5763	'PTMS'	mRNA	0.472849	1.33175e-08
80022	'MYO15B'	mRNA	-0.67667	1.34795e-08
5905	'RANGAP1'	mRNA	-0.436465	1.39236e-08
90861	'JPT2'	mRNA	-0.358877	1.39236e-08
10682	'EBP'	mRNA	-0.482886	1.43582e-08
56133	'PCDHB2'	mRNA	0.522161	1.4623e-08
55596	'ZCCHC8'	mRNA	-0.542385	1.46967e-08
5591	'PRKDC'	mRNA	-0.442525	1.46967e-08
80150	'ASRGL1'	mRNA	-0.618816	1.48174e-08
435	'ASL'	mRNA	-0.532112	1.48561e-08
9631	'NUP155'	mRNA	-0.450315	1.51936e-08
440519	'ZNF724'	mRNA	-1.68727	1.55666e-08
2539	'G6PD'	mRNA	0.427656	1.62835e-08
11119	'BTN3A1'	mRNA	0.881935	1.62921e-08
51024	'FIS1'	mRNA	-0.468458	1.6317e-08
5612	'THAP12'	mRNA	-0.452238	1.6554e-08
2932	'GSK3B'	mRNA	0.43267	1.72432e-08
2528	'FUT6'	mRNA	0.488717	1.75852e-08
27258	'LSM3'	mRNA	-0.506933	1.81077e-08
29941	'PKN3'	mRNA	-0.546192	1.83648e-08
221	'ALDH3B1'	mRNA	0.698677	1.9574e-08
64866	'CDCP1'	mRNA	0.373502	2.01241e-08
7879	'RAB7A'	mRNA	0.341154	2.02209e-08
231	'AKR1B1'	mRNA	-0.366956	2.07001e-08
25849	'PARM1'	mRNA	-0.390424	2.09425e-08
123099	'DEGS2'	mRNA	0.3457	2.11192e-08
9881	'TRANK1'	mRNA	0.938069	2.14732e-08
27132	'CPNE7'	mRNA	-0.52271	2.18219e-08
2264	'FGFR4'	mRNA	-0.693799	2.19633e-08
1856	'DVL2'	mRNA	-0.427564	2.30593e-08
147495	'APCDD1'	mRNA	0.335492	2.3117e-08
55902	'ACSS2'	mRNA	-0.503501	2.32415e-08
80830	'APOL6'	mRNA	-0.567254	2.34237e-08
23270	'TSPYL4'	mRNA	0.53151	2.35177e-08
476	'ATP1A1'	mRNA	0.297322	2.41392e-08
80198	'MUS81'	mRNA	-0.455907	2.43467e-08
11243	'PMF1'	mRNA	-0.533586	2.44618e-08
78991	'PCYOX1L'	mRNA	-0.527049	2.44618e-08
132660	'LIN54'	mRNA	-0.655328	2.52173e-08
55347	'ABHD10'	mRNA	-0.508073	2.57105e-08
9846	'GAB2'	mRNA	-0.574869	2.59176e-08
53841	'CDHR5'	mRNA	0.589933	2.62633e-08
57589	'RIC1'	mRNA	0.568739	2.63036e-08
10226	'PLIN3'	mRNA	0.523194	2.72206e-08
90313	'TP53I13'	mRNA	-0.504822	2.72206e-08
216	'ALDH1A1'	mRNA	0.598303	2.73846e-08
10580	'SORBS1'	mRNA	-0.610782	2.78336e-08
127707	'KLHDC7A'	mRNA	1.56471	2.8201e-08
60492	'CCDC90B'	mRNA	0.521876	2.86584e-08
54516	'MTRF1L'	mRNA	0.56188	2.97828e-08
1009	'CDH11'	mRNA	1.0007	2.99325e-08
10076	'PTPRU'	mRNA	0.480195	3.03987e-08
271	'AMPD2'	mRNA	0.436978	3.12361e-08
86	'ACTL6A'	mRNA	-0.444172	3.19751e-08
79651	'RHBDF2'	mRNA	0.496816	3.3395e-08
3399	'ID3'	mRNA	0.31322	3.35241e-08
25941	'TPGS2'	mRNA	-0.364356	3.35454e-08
347735	'SERINC2'	mRNA	0.342391	3.35454e-08
2959	'GTF2B'	mRNA	0.579869	3.38048e-08
10272	'FSTL3'	mRNA	0.690628	3.38656e-08
2524	'FUT2'	mRNA	0.606324	3.39074e-08
3992	'FADS1'	mRNA	-0.384365	3.39074e-08
6574	'SLC20A1'	mRNA	-0.450868	3.39121e-08
1933	'EEF1B2'	mRNA	-0.354294	3.41794e-08
84080	'ENKD1'	mRNA	-0.75716	3.42342e-08
5347	'PLK1'	mRNA	-1.09407	3.57043e-08
2529	'FUT7'	mRNA	-0.754644	3.59548e-08
9781	'RNF144A'	mRNA	-0.717651	3.68e-08
9159	'PCSK7'	mRNA	0.469219	3.74215e-08
130367	'SGPP2'	mRNA	0.419772	3.77763e-08
51175	'TUBE1'	mRNA	-0.595857	3.77763e-08
4902	'NRTN'	mRNA	-1.14437	3.81618e-08
5644	'PRSS1'	mRNA	-0.730145	3.85656e-08
27433	'TOR2A'	mRNA	-0.542851	3.8926e-08
79169	'C1orf35'	mRNA	-0.527895	3.91776e-08
677	'ZFP36L1'	mRNA	0.496536	3.91793e-08
283463	'MUC19'	mRNA	3.02901	3.92671e-08
64756	'ATPAF1'	mRNA	-0.44146	4.17702e-08
5653	'KLK6'	mRNA	0.385133	4.25844e-08
23450	'SF3B3'	mRNA	-0.349035	4.29458e-08
5436	'POLR2G'	mRNA	-0.467429	4.29458e-08
4734	'NEDD4'	mRNA	-0.648128	4.34019e-08
83860	'TAF3'	mRNA	0.603496	4.51558e-08
29995	'LMCD1'	mRNA	-1.31767	4.6337e-08
29798	'C2orf27A'	mRNA	0.775294	4.64172e-08
2639	'GCDH'	mRNA	-0.580139	4.65057e-08
6768	'ST14'	mRNA	0.327512	4.67086e-08
1808	'DPYSL2'	mRNA	-0.420015	4.72951e-08
5530	'PPP3CA'	mRNA	0.475143	4.95013e-08
148213	'ZNF681'	mRNA	-0.845387	4.99006e-08
79794	'SPRING1'	mRNA	0.473738	5.01987e-08
23030	'KDM4B'	mRNA	0.449369	5.05538e-08
22954	'TRIM32'	mRNA	0.54549	5.13402e-08
113146	'AHNAK2'	mRNA	0.853285	5.14015e-08
4957	'ODF2'	mRNA	-0.435505	5.17067e-08
63901	'FAM111A'	mRNA	-0.500044	5.25053e-08
2710	'GK'	mRNA	-0.838575	5.44941e-08
6432	'SRSF7'	mRNA	-0.404391	5.47628e-08
1152	'CKB'	mRNA	-0.342068	5.54059e-08
55731	'FAM222B'	mRNA	0.510394	5.78365e-08
10475	'TRIM38'	mRNA	0.551637	6.01112e-08
567	'B2M'	mRNA	0.381174	6.2508e-08
54487	'DGCR8'	mRNA	-0.468657	6.29167e-08
10591	'DNPH1'	mRNA	-0.421128	6.34704e-08
8764	'TNFRSF14'	mRNA	0.481832	6.53266e-08
126382	'NR2C2AP'	mRNA	-0.63574	6.88353e-08
151230	'KLHL23'	mRNA	-0.623476	6.91728e-08
51593	'SRRT'	mRNA	0.381184	6.99689e-08
191	'AHCY'	mRNA	-0.301929	7.07089e-08
7633	'ZNF79'	mRNA	0.789051	7.0718e-08
54902	'TTC19'	mRNA	-0.366768	7.09627e-08
64766	'S100PBP'	mRNA	-0.768567	7.10581e-08
1174	'AP1S1'	mRNA	0.351823	7.31893e-08
54491	'OTULINL'	mRNA	-0.722007	7.34971e-08
149041	'RC3H1'	mRNA	0.667063	7.3965e-08
56654	'NPDC1'	mRNA	-0.391163	7.46335e-08
23025	'UNC13A'	mRNA	1.97141	7.586e-08
6184	'RPN1'	mRNA	-0.308885	7.6162e-08
55556	'ENOSF1'	mRNA	-0.505848	7.69298e-08
22906	'TRAK1'	mRNA	0.393368	7.79065e-08
85415	'RHPN2'	mRNA	0.380295	7.95793e-08
4025	'LPO'	mRNA	-1.24869	8.33534e-08
51663	'ZFR'	mRNA	0.377633	8.38217e-08
114879	'OSBPL5'	mRNA	-0.364319	8.39856e-08
311	'ANXA11'	mRNA	0.329414	8.68e-08
3965	'LGALS9'	mRNA	0.403399	8.8382e-08
10444	'ZER1'	mRNA	0.431139	8.85712e-08
8894	'EIF2S2'	mRNA	-0.41218	8.90399e-08
255189	'PLA2G4F'	mRNA	0.745537	8.91715e-08
81603	'TRIM8'	mRNA	0.488039	8.94869e-08
80174	'DBF4B'	mRNA	-0.649718	9.07573e-08
29843	'SENP1'	mRNA	-0.615668	9.24698e-08
79073	'TMEM109'	mRNA	-0.464079	9.25268e-08
58487	'CREBZF'	mRNA	-0.408862	9.29531e-08
56941	'HMCES'	mRNA	-0.423692	9.43768e-08
326625	'MMAB'	mRNA	-0.461131	1.04216e-07
117177	'RAB3IP'	mRNA	-0.468175	1.04544e-07
9842	'PLEKHM1'	mRNA	0.48003	1.06383e-07
9070	'ASH2L'	mRNA	-0.514878	1.07053e-07
387522	'TMEM189-UBE2V1'	mRNA	0.576341	1.08089e-07
8815	'BANF1'	mRNA	-0.405724	1.08515e-07
80347	'COASY'	mRNA	0.36442	1.09017e-07
7161	'TP73'	mRNA	1.82515	1.10162e-07
6122	'RPL3'	mRNA	-0.342275	1.11202e-07
29990	'PILRB'	mRNA	-0.587325	1.11267e-07
10174	'SORBS3'	mRNA	-0.409087	1.16009e-07
120224	'TMEM45B'	mRNA	0.420795	1.17547e-07
283377	'SPRYD4'	mRNA	0.610811	1.1798e-07
149175	'MANEAL'	mRNA	-0.474404	1.18407e-07
7617	'ZNF66'	mRNA	0.598251	1.18578e-07
2180	'ACSL1'	mRNA	0.405892	1.18989e-07
4436	'MSH2'	mRNA	-0.486955	1.19359e-07
5284	'PIGR'	mRNA	-0.38796	1.2078e-07
4521	'NUDT1'	mRNA	-0.682844	1.22003e-07
79647	'AKIRIN1'	mRNA	0.408437	1.23028e-07
64769	'MEAF6'	mRNA	-0.456563	1.26361e-07
6596	'HLTF'	mRNA	-0.741287	1.27402e-07
84140	'FAM161A'	mRNA	-1.1404	1.28408e-07
6774	'STAT3'	mRNA	0.391003	1.3067e-07
85477	'SCIN'	mRNA	1.0894	1.31948e-07
3108	'HLA-DMA'	mRNA	0.716174	1.32225e-07
84640	'USP38'	mRNA	0.494813	1.34915e-07
164668	'APOBEC3H'	mRNA	2.76124	1.35965e-07
85407	'NKD1'	mRNA	0.391198	1.36346e-07
283871	'PGP'	mRNA	-0.403303	1.36492e-07
6934	'TCF7L2'	mRNA	0.581385	1.37136e-07
79228	'THOC6'	mRNA	-0.53325	1.37136e-07
55269	'PSPC1'	mRNA	-0.427765	1.38231e-07
79096	'C11orf49'	mRNA	-0.437117	1.39061e-07
814	'CAMK4'	mRNA	-0.685976	1.39061e-07
8529	'CYP4F2'	mRNA	0.499644	1.40426e-07
9738	'CCP110'	mRNA	-0.660546	1.41007e-07
2896	'GRN'	mRNA	0.310668	1.41905e-07
81671	'VMP1'	mRNA	0.409092	1.42135e-07
84861	'KLHL22'	mRNA	-0.636084	1.42135e-07
116071	'BATF2'	mRNA	0.737806	1.43119e-07
153768	'PRELID2'	mRNA	-0.804982	1.43813e-07
387	'RHOA'	mRNA	-0.317865	1.44026e-07
47	'ACLY'	mRNA	-0.309288	1.4422e-07
65990	'ANTKMT'	mRNA	-0.599486	1.45261e-07
55858	'TMEM165'	mRNA	0.465676	1.45463e-07
8313	'AXIN2'	mRNA	0.333677	1.46462e-07
6469	'SHH'	mRNA	0.441512	1.477e-07
23313	'KIAA0930'	mRNA	0.39442	1.48955e-07
387680	'WASHC2A'	mRNA	0.404563	1.51953e-07
9994	'CASP8AP2'	mRNA	-0.593453	1.521e-07
7327	'UBE2G2'	mRNA	0.43066	1.54341e-07
54958	'TMEM160'	mRNA	-0.570362	1.5476e-07
79892	'MCMBP'	mRNA	-0.376179	1.54915e-07
11161	'ERG28'	mRNA	-0.37007	1.60888e-07
57730	'ANKRD36B'	mRNA	-0.85468	1.61992e-07
7844	'RNF103'	mRNA	0.542512	1.63243e-07
7155	'TOP2B'	mRNA	0.319575	1.64748e-07
7071	'KLF10'	mRNA	0.484123	1.67018e-07
149986	'LSM14B'	mRNA	-0.451264	1.68644e-07
4188	'MDFI'	mRNA	0.547161	1.69179e-07
5163	'PDK1'	mRNA	-0.543842	1.69179e-07
89797	'NAV2'	mRNA	-0.975345	1.69871e-07
25902	'MTHFD1L'	mRNA	-0.406332	1.70593e-07
57523	'NYNRIN'	mRNA	0.561474	1.72221e-07
1289	'COL5A1'	mRNA	2.512	1.79881e-07
51529	'ANAPC11'	mRNA	-0.472491	1.83915e-07
10793	'ZNF273'	mRNA	-1.22871	1.9474e-07
1396	'CRIP1'	mRNA	-0.50178	1.95108e-07
85442	'KNDC1'	mRNA	-0.620135	1.96519e-07
131096	'KCNH8'	mRNA	0.709195	2.00897e-07
135932	'TMEM139'	mRNA	0.555625	2.04353e-07
23015	'GOLGA8A'	mRNA	-0.402715	2.0451e-07
5646	'PRSS3'	mRNA	0.454589	2.06856e-07
10891	'PPARGC1A'	mRNA	1.21253	2.09613e-07
27125	'AFF4'	mRNA	0.495884	2.11146e-07
51634	'RBMX2'	mRNA	-0.461626	2.16609e-07
1044	'CDX1'	mRNA	0.358061	2.16711e-07
2553	'GABPB1'	mRNA	-0.699808	2.22545e-07
5965	'RECQL'	mRNA	-0.595426	2.23535e-07
3133	'HLA-E'	mRNA	0.3631	2.26352e-07
10970	'CKAP4'	mRNA	-0.375131	2.30542e-07
51335	'NGRN'	mRNA	-0.435316	2.31449e-07
64421	'DCLRE1C'	mRNA	-0.728287	2.32499e-07
26519	'TIMM10'	mRNA	-0.518145	2.38211e-07
79961	'DENND2D'	mRNA	0.497948	2.39656e-07
122769	'LRR1'	mRNA	-0.682822	2.39703e-07
9657	'IQCB1'	mRNA	-0.600159	2.40783e-07
114034	'TOE1'	mRNA	-0.570594	2.41673e-07
23094	'SIPA1L3'	mRNA	0.487283	2.42263e-07
6398	'SECTM1'	mRNA	0.450087	2.4251e-07
79002	'TRIR'	mRNA	-0.35971	2.45051e-07
3608	'ILF2'	mRNA	-0.314377	2.48963e-07
118881	'COMTD1'	mRNA	-0.577752	2.49477e-07
84552	'PARD6G'	mRNA	0.656807	2.53706e-07
10921	'RNPS1'	mRNA	-0.312996	2.53762e-07
54346	'UNC93A'	mRNA	-1.3173	2.57554e-07
200765	'TIGD1'	mRNA	0.708672	2.60257e-07
374918	'IGFL1'	mRNA	0.898967	2.65415e-07
26057	'ANKRD17'	mRNA	0.409241	2.66705e-07
81855	'SFXN3'	mRNA	0.432081	2.66705e-07
79981	'FRMD1'	mRNA	-1.16976	2.81702e-07
57178	'ZMIZ1'	mRNA	0.523463	2.82329e-07
140775	'SMCR8'	mRNA	0.531271	2.95123e-07
65078	'RTN4R'	mRNA	-0.615854	2.97005e-07
9099	'USP2'	mRNA	1.05237	2.97196e-07
285855	'RPL7L1'	mRNA	0.36802	2.97281e-07
26751	'SH3YL1'	mRNA	-0.433941	2.9883e-07
3958	'LGALS3'	mRNA	0.314153	3.01436e-07
9114	'ATP6V0D1'	mRNA	0.401306	3.0192e-07
56339	'METTL3'	mRNA	-0.448854	3.06571e-07
5900	'RALGDS'	mRNA	0.380358	3.09749e-07
83641	'FAM107B'	mRNA	-0.541508	3.09749e-07
1466	'CSRP2'	mRNA	-0.883045	3.10816e-07
1191	'CLU'	mRNA	0.511845	3.12094e-07
123879	'DCUN1D3'	mRNA	0.783833	3.12282e-07
9158	'FIBP'	mRNA	-0.354092	3.1502e-07
54800	'KLHL24'	mRNA	0.578403	3.19587e-07
113675	'SDSL'	mRNA	0.649499	3.24243e-07
57646	'USP28'	mRNA	-0.482795	3.28217e-07
9536	'PTGES'	mRNA	1.67285	3.38121e-07
5881	'RAC3'	mRNA	-0.512529	3.45596e-07
51293	'CD320'	mRNA	-0.419834	3.47165e-07
55333	'SYNJ2BP'	mRNA	0.491491	3.69755e-07
55352	'COPRS'	mRNA	-0.530437	3.75675e-07
51691	'LSM8'	mRNA	-0.536516	3.82367e-07
9578	'CDC42BPB'	mRNA	0.326633	3.84608e-07
53917	'RAB24'	mRNA	-0.486045	3.87251e-07
54541	'DDIT4'	mRNA	-0.424196	3.87527e-07
22994	'CEP131'	mRNA	-0.504415	3.87833e-07
1953	'MEGF6'	mRNA	-0.678277	3.89061e-07
4607	'MYBPC3'	mRNA	2.53899	3.89074e-07
3600	'IL15'	mRNA	-0.950998	4.01652e-07
6838	'SURF6'	mRNA	0.429248	4.01652e-07
53836	'GPR87'	mRNA	3.4129	4.02371e-07
9144	'SYNGR2'	mRNA	0.286015	4.05833e-07
100131211	'NEMP2'	mRNA	-1.27114	4.08018e-07
24149	'ZNF318'	mRNA	-0.526247	4.08687e-07
9289	'ADGRG1'	mRNA	0.37888	4.23841e-07
22984	'PDCD11'	mRNA	0.350839	4.26984e-07
79654	'HECTD3'	mRNA	0.373238	4.33572e-07
5447	'POR'	mRNA	0.357078	4.3522e-07
10811	'NOXA1'	mRNA	-0.616639	4.36201e-07
6904	'TBCD'	mRNA	-0.350146	4.38963e-07
8089	'YEATS4'	mRNA	-0.57045	4.39606e-07
2263	'FGFR2'	mRNA	0.479174	4.44577e-07
2877	'GPX2'	mRNA	0.315577	4.44577e-07
10951	'CBX1'	mRNA	-0.423872	4.49185e-07
7004	'TEAD4'	mRNA	-0.507715	4.50859e-07
81889	'FAHD1'	mRNA	0.533712	4.53309e-07
283899	'INO80E'	mRNA	-0.385101	4.61399e-07
1021	'CDK6'	mRNA	0.432592	4.64809e-07
5914	'RARA'	mRNA	0.500364	4.66871e-07
6171	'RPL41'	mRNA	-0.33977	4.72725e-07
51278	'IER5'	mRNA	0.519543	4.78604e-07
3783	'KCNN4'	mRNA	0.44624	4.83992e-07
11076	'TPPP'	mRNA	0.46754	4.87299e-07
150	'ADRA2A'	mRNA	0.395846	4.90699e-07
90102	'PHLDB2'	mRNA	-0.695865	4.91018e-07
7587	'ZNF37A'	mRNA	0.541174	4.91773e-07
8563	'THOC5'	mRNA	-0.506025	4.92229e-07
440603	'BCL2L15'	mRNA	1.38197	4.93671e-07
2803	'GOLGA4'	mRNA	0.338953	4.94351e-07
284252	'KCTD1'	mRNA	0.621271	5.10299e-07
51279	'C1RL'	mRNA	0.586673	5.10299e-07
5916	'RARG'	mRNA	0.407839	5.1242e-07
118429	'ANTXR2'	mRNA	0.411196	5.25214e-07
4615	'MYD88'	mRNA	0.379898	5.3044e-07
79960	'JADE1'	mRNA	-0.554367	5.36079e-07
6416	'MAP2K4'	mRNA	0.486488	5.38528e-07
78999	'LRFN4'	mRNA	0.396	5.40232e-07
824	'CAPN2'	mRNA	0.3709	5.46059e-07
5883	'RAD9A'	mRNA	-0.581452	5.51512e-07
9762	'LZTS3'	mRNA	0.426063	5.63347e-07
991	'CDC20'	mRNA	-0.504266	5.65948e-07
54622	'ARL15'	mRNA	0.714713	5.85009e-07
84058	'WDR54'	mRNA	-0.739801	5.91048e-07
375449	'MAST4'	mRNA	0.636074	5.97174e-07
55777	'MBD5'	mRNA	0.638356	6.04104e-07
2086	'ERV3-1'	mRNA	0.531489	6.07862e-07
5966	'REL'	mRNA	0.342658	6.08762e-07
55808	'ST6GALNAC1'	mRNA	-0.399036	6.15033e-07
5438	'POLR2I'	mRNA	-0.454592	6.28185e-07
1376	'CPT2'	mRNA	0.375268	6.32898e-07
6623	'SNCG'	mRNA	1.33123	6.50782e-07
79102	'RNF26'	mRNA	-0.487972	6.69691e-07
51236	'HGH1'	mRNA	-0.395655	6.73934e-07
100463486	'MTRNR2L8'	mRNA	0.367356	6.76443e-07
51496	'CTDSPL2'	mRNA	-0.504881	6.76597e-07
1499	'CTNNB1'	mRNA	0.257806	6.83945e-07
8357	'H3C10'	mRNA	1.83642	6.88049e-07
58190	'CTDSP1'	mRNA	-0.326961	6.97605e-07
7840	'ALMS1'	mRNA	-0.602528	6.97605e-07
83481	'EPPK1'	mRNA	0.808879	6.97858e-07
84733	'CBX2'	mRNA	-0.393819	7.01068e-07
1434	'CSE1L'	mRNA	-0.353769	7.09479e-07
6613	'SUMO2'	mRNA	-0.406312	7.17421e-07
9675	'TTI1'	mRNA	-0.473613	7.19356e-07
8812	'CCNK'	mRNA	0.491402	7.25906e-07
2101	'ESRRA'	mRNA	0.370632	7.44196e-07
7532	'YWHAG'	mRNA	0.328136	7.65006e-07
4292	'MLH1'	mRNA	-0.449433	7.67155e-07
161145	'TMEM229B'	mRNA	0.96916	7.71422e-07
788	'SLC25A20'	mRNA	0.702014	7.74689e-07
57561	'ARRDC3'	mRNA	0.590175	7.93082e-07
10539	'GLRX3'	mRNA	0.357024	7.97321e-07
653583	'PHLDB3'	mRNA	0.574467	8.06209e-07
8721	'EDF1'	mRNA	-0.295673	8.10733e-07
7936	'NELFE'	mRNA	-0.417862	8.12287e-07
79441	'HAUS3'	mRNA	-0.667474	8.25082e-07
163227	'ZNF100'	mRNA	-0.824558	8.43096e-07
57674	'RNF213'	mRNA	0.416313	8.43096e-07
55603	'TENT5A'	mRNA	0.698437	8.77141e-07
80336	'PABPC1L'	mRNA	-0.992838	8.86066e-07
1351	'COX8A'	mRNA	-0.320488	8.97424e-07
230	'ALDOC'	mRNA	-0.4557	9.02636e-07
147138	'TMC8'	mRNA	0.503258	9.0644e-07
808	'CALM3'	mRNA	-0.296859	9.0644e-07
80352	'RNF39'	mRNA	0.796744	9.15808e-07
6877	'TAF5'	mRNA	-0.929884	9.25912e-07
84674	'CARD6'	mRNA	1.59888	9.3364e-07
4841	'NONO'	mRNA	-0.310307	9.36158e-07
813	'CALU'	mRNA	-0.397723	9.38259e-07
10327	'AKR1A1'	mRNA	-0.340894	9.56159e-07
130574	'LYPD6'	mRNA	-0.706808	9.6043e-07
2907	'GRINA'	mRNA	0.315983	9.60913e-07
91404	'SESTD1'	mRNA	-0.581612	9.61504e-07
3204	'HOXA7'	mRNA	0.474459	9.6701e-07
1907	'EDN2'	mRNA	1.65438	9.70026e-07
10916	'MAGED2'	mRNA	0.369459	9.72918e-07
201973	'PRIMPOL'	mRNA	-0.843985	9.76414e-07
28960	'DCPS'	mRNA	-0.443991	9.76414e-07
60686	'C14orf93'	mRNA	-0.644454	9.86619e-07
23530	'NNT'	mRNA	-0.407991	9.86765e-07
55337	'SHFL'	mRNA	0.427379	9.97324e-07
6303	'SAT1'	mRNA	-0.364855	1.00203e-06
203	'AK1'	mRNA	0.357886	1.00864e-06
11202	'KLK8'	mRNA	0.465536	1.01015e-06
84913	'ATOH8'	mRNA	0.578883	1.01873e-06
56952	'PRTFDC1'	mRNA	-0.666086	1.02605e-06
79621	'RNASEH2B'	mRNA	-0.535989	1.03217e-06
3005	'H1-0'	mRNA	0.360546	1.04126e-06
10695	'CNPY3'	mRNA	-0.395711	1.07136e-06
84327	'ZBED3'	mRNA	-0.425458	1.08953e-06
2187	'FANCB'	mRNA	-1.73545	1.09151e-06
387263	'C6orf120'	mRNA	0.480713	1.09543e-06
8618	'CADPS'	mRNA	0.513632	1.10317e-06
54552	'GNL3L'	mRNA	0.490449	1.10626e-06
5635	'PRPSAP1'	mRNA	-0.448829	1.10627e-06
64798	'DEPTOR'	mRNA	-0.611289	1.11286e-06
57224	'NHSL1'	mRNA	-0.527271	1.12768e-06
2954	'GSTZ1'	mRNA	-0.52825	1.13329e-06
2495	'FTH1'	mRNA	0.78054	1.13835e-06
593	'BCKDHA'	mRNA	-0.326086	1.15092e-06
51021	'MRPS16'	mRNA	-0.34943	1.15326e-06
57763	'ANKRA2'	mRNA	0.549774	1.18244e-06
84279	'PRADC1'	mRNA	-0.582631	1.21397e-06
79714	'CCDC51'	mRNA	0.488971	1.25585e-06
23005	'MAPKBP1'	mRNA	0.437728	1.25611e-06
9371	'KIF3B'	mRNA	0.368696	1.25944e-06
5226	'PGD'	mRNA	-0.27638	1.2668e-06
387893	'KMT5A'	mRNA	-0.436732	1.27996e-06
22996	'TTC39A'	mRNA	0.744599	1.28111e-06
286077	'FAM83H'	mRNA	0.432472	1.29614e-06
200894	'ARL13B'	mRNA	-0.666239	1.32932e-06
3557	'IL1RN'	mRNA	1.86444	1.33655e-06
64859	'NABP1'	mRNA	0.956563	1.37485e-06
55343	'SLC35C1'	mRNA	0.379766	1.38691e-06
54876	'DCAF16'	mRNA	-0.471266	1.42761e-06
55245	'UQCC1'	mRNA	0.461863	1.43652e-06
81669	'CCNL2'	mRNA	-0.379113	1.44029e-06
80270	'HSD3B7'	mRNA	-0.495019	1.44644e-06
56652	'TWNK'	mRNA	0.464461	1.45081e-06
57464	'STRIP2'	mRNA	-0.704709	1.47254e-06
93611	'FBXO44'	mRNA	0.474679	1.47315e-06
83959	'SLC4A11'	mRNA	0.571308	1.48012e-06
23344	'ESYT1'	mRNA	-0.299609	1.49082e-06
126133	'ALDH16A1'	mRNA	-0.49718	1.50831e-06
401474	'SAMD12'	mRNA	0.621207	1.50831e-06
9245	'GCNT3'	mRNA	0.466878	1.50831e-06
22837	'COBLL1'	mRNA	-0.764399	1.5103e-06
3313	'HSPA9'	mRNA	-0.319565	1.51112e-06
64757	'MTARC1'	mRNA	-0.50281	1.53818e-06
5638	'PRRG1'	mRNA	0.640299	1.5446e-06
2990	'GUSB'	mRNA	-0.375651	1.56396e-06
8031	'NCOA4'	mRNA	0.336375	1.59561e-06
8623	'ASMTL'	mRNA	-0.487117	1.60547e-06
8904	'CPNE1'	mRNA	-0.317816	1.62959e-06
8514	'KCNAB2'	mRNA	0.394602	1.63934e-06
11345	'GABARAPL2'	mRNA	0.493104	1.66422e-06
2760	'GM2A'	mRNA	0.429676	1.67373e-06
124540	'MSI2'	mRNA	0.371917	1.68486e-06
2048	'EPHB2'	mRNA	-0.349808	1.70926e-06
55729	'ATF7IP'	mRNA	0.440217	1.74745e-06
119467	'CLRN3'	mRNA	0.530043	1.80737e-06
143888	'POGLUT3'	mRNA	-0.940421	1.85406e-06
3099	'HK2'	mRNA	-0.378399	1.86257e-06
9063	'PIAS2'	mRNA	0.469657	1.86873e-06
2580	'GAK'	mRNA	0.345345	1.91712e-06
10212	'DDX39A'	mRNA	-0.32787	1.93147e-06
389831	'LOC389831'	mRNA	-0.751969	1.93162e-06
84875	'PARP10'	mRNA	0.35571	1.93604e-06
6137	'RPL13'	mRNA	-0.244716	1.9384e-06
10300	'KATNB1'	mRNA	-0.448096	1.9475e-06
5729	'PTGDR'	mRNA	-1.1693	1.95087e-06
126820	'DNAI3'	mRNA	2.82023	1.97109e-06
100288332	'NPIPA5'	mRNA	-0.544042	2.01191e-06
1140	'CHRNB1'	mRNA	-0.47804	2.03276e-06
253725	'WASHC2C'	mRNA	0.368479	2.03503e-06
56928	'SPPL2B'	mRNA	-0.380569	2.03533e-06
10019	'SH2B3'	mRNA	-0.531214	2.03617e-06
11196	'SEC23IP'	mRNA	0.371042	2.05235e-06
54820	'NDE1'	mRNA	-0.447989	2.07381e-06
2647	'BLOC1S1'	mRNA	-0.411408	2.07814e-06
6782	'HSPA13'	mRNA	-0.503152	2.07814e-06
4801	'NFYB'	mRNA	-0.580607	2.11427e-06
35	'ACADS'	mRNA	-0.442929	2.11605e-06
9743	'ARHGAP32'	mRNA	0.348836	2.14367e-06
9209	'LRRFIP2'	mRNA	-0.476425	2.1509e-06
81894	'SLC25A28'	mRNA	-0.444272	2.1819e-06
84844	'PHF5A'	mRNA	-0.46169	2.18706e-06
389792	'IER5L'	mRNA	0.373654	2.19821e-06
83786	'FRMD8'	mRNA	0.47773	2.20841e-06
79575	'ABHD8'	mRNA	0.434066	2.26017e-06
11094	'CACFD1'	mRNA	0.573222	2.26914e-06
6867	'TACC1'	mRNA	-0.507191	2.34587e-06
64284	'RAB17'	mRNA	0.46571	2.39658e-06
84319	'CMSS1'	mRNA	-0.472197	2.40656e-06
122809	'SOCS4'	mRNA	0.506296	2.41458e-06
6595	'SMARCA2'	mRNA	-0.370618	2.42003e-06
3308	'HSPA4'	mRNA	0.309506	2.46012e-06
80019	'UBTD1'	mRNA	0.526983	2.4719e-06
9050	'PSTPIP2'	mRNA	0.451915	2.48593e-06
1577	'CYP3A5'	mRNA	0.799044	2.49168e-06
80097	'MZT2B'	mRNA	-0.402351	2.5391e-06
22955	'SCMH1'	mRNA	-0.440276	2.59295e-06
55500	'ETNK1'	mRNA	0.40755	2.59295e-06
285753	'CEP57L1'	mRNA	-0.67544	2.60648e-06
80274	'SCUBE1'	mRNA	-1.41499	2.61623e-06
113251	'LARP4'	mRNA	0.404406	2.63386e-06
2968	'GTF2H4'	mRNA	-0.518341	2.68444e-06
339287	'MSL1'	mRNA	-0.337222	2.69729e-06
4931	'NVL'	mRNA	-0.543088	2.71251e-06
55135	'WRAP53'	mRNA	-0.449909	2.75797e-06
23463	'ICMT'	mRNA	-0.351614	2.76058e-06
5990	'RFX2'	mRNA	-0.993226	2.77405e-06
55917	'CTTNBP2NL'	mRNA	0.45427	2.7822e-06
3398	'ID2'	mRNA	0.351638	2.78973e-06
10735	'STAG2'	mRNA	-0.337854	2.83948e-06
148206	'ZNF714'	mRNA	-0.670458	2.85392e-06
3836	'KPNA1'	mRNA	0.371951	2.91713e-06
56942	'CMC2'	mRNA	-0.581226	2.99542e-06
23294	'ANKS1A'	mRNA	0.424231	3.00278e-06
150465	'TTL'	mRNA	-0.41875	3.04471e-06
5058	'PAK1'	mRNA	-0.360467	3.14842e-06
3422	'IDI1'	mRNA	-0.386553	3.16301e-06
8844	'KSR1'	mRNA	0.632823	3.18155e-06
2023	'ENO1'	mRNA	-0.326956	3.18357e-06
200810	'ALG1L'	mRNA	0.721431	3.29298e-06
9901	'SRGAP3'	mRNA	0.480449	3.29298e-06
55001	'TTC22'	mRNA	0.618807	3.33126e-06
10765	'KDM5B'	mRNA	0.488958	3.36253e-06
3609	'ILF3'	mRNA	-0.290107	3.36253e-06
5639	'PRRG2'	mRNA	0.647886	3.36643e-06
811	'CALR'	mRNA	-0.273434	3.36663e-06
284348	'LYPD5'	mRNA	-1.27474	3.4137e-06
144097	'SPINDOC'	mRNA	-0.445342	3.42901e-06
9232	'PTTG1'	mRNA	-0.435407	3.48863e-06
2271	'FH'	mRNA	-0.367928	3.51658e-06
30811	'HUNK'	mRNA	-0.375027	3.53191e-06
10525	'HYOU1'	mRNA	-0.323871	3.78126e-06
9230	'RAB11B'	mRNA	-0.322905	3.82138e-06
55187	'VPS13D'	mRNA	0.411	3.83241e-06
55071	'C9orf40'	mRNA	-0.625938	3.89157e-06
5727	'PTCH1'	mRNA	0.463195	3.90652e-06
64744	'SMAP2'	mRNA	-0.335925	4.01286e-06
123207	'C15orf40'	mRNA	0.449837	4.0342e-06
64943	'NT5DC2'	mRNA	-0.294907	4.05235e-06
51361	'HOOK1'	mRNA	-0.388247	4.07189e-06
220	'ALDH1A3'	mRNA	0.894577	4.07504e-06
29927	'SEC61A1'	mRNA	0.271613	4.07987e-06
23406	'COTL1'	mRNA	-0.348913	4.08218e-06
5871	'MAP4K2'	mRNA	-0.361385	4.09436e-06
54974	'THG1L'	mRNA	-0.592391	4.10496e-06
3178	'HNRNPA1'	mRNA	-0.31549	4.14915e-06
320	'APBA1'	mRNA	1.38341	4.15663e-06
84958	'SYTL1'	mRNA	0.408066	4.24523e-06
2802	'GOLGA3'	mRNA	0.384655	4.24816e-06
57409	'MIF4GD'	mRNA	-0.440117	4.24952e-06
81567	'TXNDC5'	mRNA	-0.27479	4.3753e-06
29799	'YPEL1'	mRNA	-0.862202	4.38929e-06
1182	'CLCN3'	mRNA	0.324042	4.42879e-06
23446	'SLC44A1'	mRNA	-0.323847	4.42879e-06
9972	'NUP153'	mRNA	-0.380447	4.4592e-06
120	'ADD3'	mRNA	-0.323476	4.479e-06
8436	'CAVIN2'	mRNA	1.48948	4.479e-06
10865	'ARID5A'	mRNA	-0.556377	4.57261e-06
90120	'TMEM250'	mRNA	0.376549	4.60035e-06
2644	'GCHFR'	mRNA	-0.486942	4.60546e-06
90378	'SAMD1'	mRNA	-0.376968	4.61182e-06
83699	'SH3BGRL2'	mRNA	0.365498	4.67299e-06
9921	'RNF10'	mRNA	0.298997	4.67299e-06
563	'AZGP1'	mRNA	-0.56842	4.69476e-06
64288	'ZSCAN31'	mRNA	0.620373	4.69501e-06
302	'ANXA2'	mRNA	0.314663	4.70772e-06
85378	'TUBGCP6'	mRNA	-0.402082	4.71188e-06
54973	'INTS11'	mRNA	-0.315421	4.72757e-06
116840	'CNTROB'	mRNA	-0.361598	4.75764e-06
4363	'ABCC1'	mRNA	0.315007	4.75765e-06
23160	'WDR43'	mRNA	0.336353	4.76912e-06
7919	'DDX39B'	mRNA	-0.282667	4.78155e-06
284161	'GDPD1'	mRNA	0.779332	4.81241e-06
55544	'RBM38'	mRNA	0.361697	4.83974e-06
55721	'IQCC'	mRNA	-0.982197	4.85674e-06
57157	'PHTF2'	mRNA	-0.540516	4.85674e-06
2556	'GABRA3'	mRNA	0.719616	4.87337e-06
656	'BMP8B'	mRNA	-0.494718	4.92727e-06
4102	'MAGEA3'	mRNA	0.31643	5.01368e-06
374286	'CDRT1'	mRNA	1.18908	5.01398e-06
284184	'NDUFAF8'	mRNA	0.426062	5.02597e-06
10856	'RUVBL2'	mRNA	-0.332113	5.09814e-06
54921	'CHTF8'	mRNA	0.431993	5.11968e-06
26000	'TBC1D10B'	mRNA	-0.377565	5.29761e-06
55559	'HAUS7'	mRNA	-0.511367	5.30418e-06
10058	'ABCB6'	mRNA	0.640615	5.44404e-06
79784	'MYH14'	mRNA	0.377364	5.46627e-06
8202	'NCOA3'	mRNA	0.518926	5.49836e-06
223	'ALDH9A1'	mRNA	-0.359035	5.57257e-06
23347	'SMCHD1'	mRNA	-0.471689	5.58383e-06
53349	'ZFYVE1'	mRNA	0.517888	5.58461e-06
92610	'TIFA'	mRNA	-0.724874	5.6272e-06
282969	'FUOM'	mRNA	-0.514937	5.71374e-06
3993	'LLGL2'	mRNA	0.289211	5.78416e-06
4736	'RPL10A'	mRNA	-0.295186	5.79826e-06
6305	'SBF1'	mRNA	0.321721	5.80254e-06
4128	'MAOA'	mRNA	-0.492203	5.86113e-06
23216	'TBC1D1'	mRNA	-0.371013	5.8996e-06
11124	'FAF1'	mRNA	-0.371231	5.94647e-06
23031	'MAST3'	mRNA	0.430263	5.94647e-06
90060	'CCDC120'	mRNA	0.538399	5.94647e-06
117178	'SSX2IP'	mRNA	-0.478256	6.05784e-06
25942	'SIN3A'	mRNA	-0.358492	6.0704e-06
80331	'DNAJC5'	mRNA	0.359668	6.0704e-06
2110	'ETFDH'	mRNA	0.493709	6.07606e-06
64175	'P3H1'	mRNA	-0.457892	6.12026e-06
57719	'ANO8'	mRNA	-0.397581	6.20298e-06
9475	'ROCK2'	mRNA	0.327947	6.30131e-06
7039	'TGFA'	mRNA	0.456038	6.31622e-06
23220	'DTX4'	mRNA	0.380717	6.33236e-06
521	'ATP5ME'	mRNA	-0.459432	6.37368e-06
83549	'UCK1'	mRNA	-0.432128	6.40749e-06
4249	'MGAT5'	mRNA	0.366642	6.44852e-06
835	'CASP2'	mRNA	-0.424843	6.45046e-06
126731	'CCSAP'	mRNA	-0.626892	6.57289e-06
79807	'GSTCD'	mRNA	-0.76076	6.58219e-06
23152	'CIC'	mRNA	0.433075	6.59318e-06
54797	'MED18'	mRNA	0.606854	6.6646e-06
29954	'POMT2'	mRNA	-0.495722	6.73214e-06
54751	'FBLIM1'	mRNA	0.428318	6.73874e-06
800	'CALD1'	mRNA	0.318977	6.78045e-06
80326	'WNT10A'	mRNA	0.9108	6.81894e-06
388	'RHOB'	mRNA	0.333083	6.84256e-06
9219	'MTA2'	mRNA	0.326087	6.91723e-06
64787	'EPS8L2'	mRNA	0.325425	6.94289e-06
5734	'PTGER4'	mRNA	-0.857474	7.04323e-06
2935	'GSPT1'	mRNA	0.283519	7.04507e-06
5000	'ORC4'	mRNA	0.394011	7.09147e-06
56257	'MEPCE'	mRNA	-0.377917	7.13859e-06
25777	'SUN2'	mRNA	-0.373173	7.19157e-06
375444	'C5orf34'	mRNA	-0.85062	7.3186e-06
55644	'OSGEP'	mRNA	-0.472565	7.3845e-06
1543	'CYP1A1'	mRNA	-0.674417	7.44947e-06
6498	'SKIL'	mRNA	0.553265	7.55989e-06
101927345	'LOC101927345'	mRNA	1.15037	7.80582e-06
10595	'ERN2'	mRNA	0.420045	7.88301e-06
51703	'ACSL5'	mRNA	0.283522	7.99276e-06
26015	'RPAP1'	mRNA	0.39139	8.60427e-06
55222	'LRRC20'	mRNA	-0.395772	8.60427e-06
5540	'NPY4R'	mRNA	0.766629	8.60427e-06
4494	'MT1F'	mRNA	-0.781204	8.66451e-06
9380	'GRHPR'	mRNA	-0.298725	8.66451e-06
8992	'ATP6V0E1'	mRNA	0.421118	8.66938e-06
84342	'COG8'	mRNA	0.389218	8.6942e-06
102723502	'LOC102723502'	mRNA	3.09756	8.70644e-06
10400	'PEMT'	mRNA	-0.358239	8.77402e-06
6662	'SOX9'	mRNA	0.408055	8.7782e-06
119587	'CPXM2'	mRNA	1.74952	8.9259e-06
7157	'TP53'	mRNA	-0.368882	8.9259e-06
9208	'LRRFIP1'	mRNA	0.301042	8.9259e-06
23139	'MAST2'	mRNA	-0.345827	8.92841e-06
55041	'PLEKHB2'	mRNA	0.291989	9.03153e-06
9513	'FXR2'	mRNA	0.341152	9.07814e-06
729359	'PLIN4'	mRNA	0.711411	9.13496e-06
1975	'EIF4B'	mRNA	-0.243784	9.18393e-06
5696	'PSMB8'	mRNA	0.37048	9.29883e-06
55819	'RNF130'	mRNA	-0.414802	9.31954e-06
10110	'SGK2'	mRNA	0.739088	9.34419e-06
51460	'SFMBT1'	mRNA	-0.530133	9.37987e-06
9967	'THRAP3'	mRNA	-0.298503	9.38499e-06
23609	'MKRN2'	mRNA	-0.368975	9.58821e-06
54894	'RNF43'	mRNA	0.288192	9.63693e-06
8818	'DPM2'	mRNA	-0.385136	9.67759e-06
152185	'SPICE1'	mRNA	-0.580643	9.6931e-06
6195	'RPS6KA1'	mRNA	0.309811	9.80502e-06
10040	'TOM1L1'	mRNA	-0.327849	9.8067e-06
153339	'TMEM167A'	mRNA	0.371344	9.8067e-06
10935	'PRDX3'	mRNA	-0.283858	9.82418e-06
5252	'PHF1'	mRNA	-0.450063	9.85024e-06
5295	'PIK3R1'	mRNA	0.427531	9.85061e-06
55775	'TDP1'	mRNA	-0.519859	1.00949e-05
8930	'MBD4'	mRNA	-0.377109	1.0203e-05
6830	'SUPT6H'	mRNA	0.290665	1.04297e-05
64063	'PRSS22'	mRNA	0.768325	1.05619e-05
130557	'ZNF513'	mRNA	0.441178	1.06063e-05
9266	'CYTH2'	mRNA	-0.29762	1.07098e-05
92815	'H2AW'	mRNA	0.840824	1.07288e-05
10101	'NUBP2'	mRNA	-0.35861	1.07438e-05
221937	'FOXK1'	mRNA	0.464139	1.0793e-05
23295	'MGRN1'	mRNA	0.373399	1.09273e-05
55157	'DARS2'	mRNA	-0.380138	1.09273e-05
4258	'MGST2'	mRNA	0.403696	1.11049e-05
54	'ACP5'	mRNA	0.60052	1.11349e-05
10869	'USP19'	mRNA	0.342707	1.12021e-05
11273	'ATXN2L'	mRNA	-0.331028	1.14078e-05
25994	'HIGD1A'	mRNA	0.375129	1.14837e-05
29985	'SLC39A3'	mRNA	-0.391817	1.15668e-05
2678	'GGT1'	mRNA	0.378221	1.17376e-05
4947	'OAZ2'	mRNA	0.366507	1.17841e-05
80020	'FOXRED2'	mRNA	-0.409478	1.18287e-05
10211	'FLOT1'	mRNA	-0.313102	1.18345e-05
6427	'SRSF2'	mRNA	-0.264608	1.18345e-05
11284	'PNKP'	mRNA	-0.443846	1.1875e-05
3981	'LIG4'	mRNA	0.559038	1.19308e-05
5289	'PIK3C3'	mRNA	0.482635	1.19649e-05
747	'DAGLA'	mRNA	0.487269	1.20375e-05
7542	'ZFPL1'	mRNA	-0.37462	1.20473e-05
3912	'LAMB1'	mRNA	-0.328585	1.2152e-05
51097	'SCCPDH'	mRNA	-0.435966	1.21574e-05
6238	'RRBP1'	mRNA	0.302334	1.22064e-05
27301	'APEX2'	mRNA	-0.337642	1.23541e-05
29102	'DROSHA'	mRNA	-0.319489	1.2389e-05
345079	'SOWAHB'	mRNA	0.505311	1.24897e-05
57544	'TXNDC16'	mRNA	-0.59659	1.2552e-05
23386	'NUDCD3'	mRNA	-0.353777	1.27189e-05
146059	'CDAN1'	mRNA	-0.469075	1.29757e-05
6337	'SCNN1A'	mRNA	0.261556	1.29757e-05
8522	'GAS7'	mRNA	0.770093	1.31621e-05
4677	'NARS1'	mRNA	-0.304311	1.31885e-05
51019	'WASHC3'	mRNA	0.388426	1.32041e-05
6810	'STX4'	mRNA	0.397599	1.3218e-05
64789	'EXO5'	mRNA	-0.854677	1.32378e-05
284613	'CYB561D1'	mRNA	0.622801	1.33156e-05
5878	'RAB5C'	mRNA	0.260634	1.34444e-05
54938	'SARS2'	mRNA	-0.379481	1.34882e-05
4150	'MAZ'	mRNA	-0.279694	1.37161e-05
84326	'METTL26'	mRNA	-0.29205	1.37824e-05
55745	'AP5M1'	mRNA	0.371758	1.38169e-05
1244	'ABCC2'	mRNA	1.59644	1.39587e-05
23187	'PHLDB1'	mRNA	0.490448	1.40391e-05
353324	'SPATA12'	mRNA	1.06177	1.40783e-05
7168	'TPM1'	mRNA	-0.319145	1.41055e-05
56649	'TMPRSS4'	mRNA	-0.349465	1.41541e-05
55969	'RAB5IF'	mRNA	0.373727	1.42607e-05
29937	'NENF'	mRNA	-0.433816	1.43151e-05
5427	'POLE2'	mRNA	-0.895172	1.44551e-05
129303	'TMEM150A'	mRNA	0.616581	1.45485e-05
6193	'RPS5'	mRNA	-0.264156	1.47505e-05
4105	'MAGEA6'	mRNA	0.301397	1.47803e-05
29035	'C16orf72'	mRNA	0.373578	1.48642e-05
29901	'SAC3D1'	mRNA	-0.526424	1.50028e-05
10015	'PDCD6IP'	mRNA	0.304802	1.5052e-05
4758	'NEU1'	mRNA	0.319265	1.50554e-05
29957	'SLC25A24'	mRNA	-0.364909	1.50615e-05
51729	'WBP11'	mRNA	-0.306651	1.50615e-05
9712	'USP6NL'	mRNA	0.346351	1.51344e-05
10626	'TRIM16'	mRNA	0.463563	1.53795e-05
6721	'SREBF2'	mRNA	-0.323288	1.54766e-05
9885	'OSBPL2'	mRNA	0.375348	1.55362e-05
55920	'RCC2'	mRNA	-0.308992	1.57497e-05
6196	'RPS6KA2'	mRNA	-0.383332	1.58953e-05
6837	'MED22'	mRNA	-0.396543	1.59474e-05
11044	'TENT4A'	mRNA	-0.383615	1.60814e-05
10013	'HDAC6'	mRNA	-0.332342	1.62611e-05
6049	'RNF6'	mRNA	0.368444	1.62611e-05
4779	'NFE2L1'	mRNA	-0.300034	1.62987e-05
143684	'FAM76B'	mRNA	-0.617752	1.64305e-05
207	'AKT1'	mRNA	-0.268747	1.65223e-05
2631	'NIPSNAP2'	mRNA	-0.408702	1.66754e-05
102724788	'LOC102724788'	mRNA	1.34355	1.68341e-05
2107	'ETF1'	mRNA	0.312932	1.68341e-05
51228	'GLTP'	mRNA	0.459483	1.68341e-05
1468	'SLC25A10'	mRNA	-0.359389	1.69465e-05
84883	'AIFM2'	mRNA	0.336521	1.6947e-05
9213	'XPR1'	mRNA	0.421854	1.71907e-05
4673	'NAP1L1'	mRNA	-0.309163	1.81275e-05
84951	'TNS4'	mRNA	0.305437	1.81325e-05
523	'ATP6V1A'	mRNA	0.439145	1.83204e-05
3720	'JARID2'	mRNA	0.400437	1.85786e-05
115426	'UHRF2'	mRNA	-0.434577	1.88088e-05
57506	'MAVS'	mRNA	0.379053	1.88737e-05
5355	'PLP2'	mRNA	-0.387742	1.8884e-05
55715	'DOK4'	mRNA	0.353966	1.89913e-05
79037	'PVRIG'	mRNA	-0.492656	1.91362e-05
10564	'ARFGEF2'	mRNA	0.371537	1.94149e-05
10042	'HMGXB4'	mRNA	-0.40657	1.9433e-05
199953	'TMEM201'	mRNA	-0.451073	1.94539e-05
55684	'RABL6'	mRNA	-0.315232	1.94539e-05
8916	'HERC3'	mRNA	-0.543016	1.95584e-05
968	'CD68'	mRNA	0.554241	1.96198e-05
8637	'EIF4EBP3'	mRNA	-0.614096	1.97797e-05
8704	'B4GALT2'	mRNA	-0.324041	1.98495e-05
84324	'SARNP'	mRNA	-0.403034	1.99045e-05
100462981	'MTRNR2L2'	mRNA	0.317069	1.99608e-05
150356	'CHADL'	mRNA	1.72595	1.99608e-05
6385	'SDC4'	mRNA	0.332107	2.02551e-05
55751	'TMEM184C'	mRNA	0.415997	2.04435e-05
255783	'INAFM1'	mRNA	-0.691879	2.05654e-05
8682	'PEA15'	mRNA	-0.384166	2.07348e-05
388564	'TMEM238'	mRNA	-0.444719	2.09077e-05
3695	'ITGB7'	mRNA	0.857234	2.09221e-05
3429	'IFI27'	mRNA	0.42193	2.09825e-05
30851	'TAX1BP3'	mRNA	0.340678	2.12894e-05
23595	'ORC3'	mRNA	-0.413341	2.15797e-05
3931	'LCAT'	mRNA	1.01086	2.16973e-05
11103	'KRR1'	mRNA	0.3016	2.17966e-05
8425	'LTBP4'	mRNA	0.316847	2.17966e-05
348995	'NUP43'	mRNA	-0.434402	2.18736e-05
1997	'ELF1'	mRNA	0.372228	2.19855e-05
64864	'RFX7'	mRNA	0.50032	2.21024e-05
283989	'TSEN54'	mRNA	-0.363806	2.25394e-05
100505989	'SMIM31'	mRNA	0.753871	2.25735e-05
4800	'NFYA'	mRNA	-0.417875	2.29157e-05
8543	'LMO4'	mRNA	-0.386264	2.29716e-05
3622	'ING2'	mRNA	-0.637548	2.30696e-05
23493	'HEY2'	mRNA	-0.901717	2.32111e-05
155061	'ZNF746'	mRNA	0.384299	2.33746e-05
140876	'RIPOR3'	mRNA	-1.97251	2.38616e-05
4723	'NDUFV1'	mRNA	-0.304765	2.39302e-05
5499	'PPP1CA'	mRNA	-0.29104	2.42866e-05
3932	'LCK'	mRNA	-0.971676	2.43712e-05
9451	'EIF2AK3'	mRNA	-0.53027	2.46523e-05
80255	'SLC35F5'	mRNA	0.389726	2.47576e-05
115650	'TNFRSF13C'	mRNA	-1.99658	2.49222e-05
124222	'PAQR4'	mRNA	-0.304023	2.56354e-05
162073	'ITPRIPL2'	mRNA	0.444195	2.57474e-05
3688	'ITGB1'	mRNA	-0.255358	2.57474e-05
343990	'CRACDL'	mRNA	0.480458	2.61067e-05
80772	'CPTP'	mRNA	0.364711	2.62637e-05
30849	'PIK3R4'	mRNA	0.429188	2.67012e-05
117246	'FTSJ3'	mRNA	0.382907	2.69995e-05
54913	'RPP25'	mRNA	-0.365278	2.70289e-05
65109	'UPF3B'	mRNA	-0.450026	2.71719e-05
57647	'DHX37'	mRNA	0.386173	2.73037e-05
6907	'TBL1X'	mRNA	-0.380773	2.74367e-05
127534	'GJB4'	mRNA	1.21929	2.74976e-05
29997	'NOP53'	mRNA	-0.266007	2.76701e-05
25959	'KANK2'	mRNA	-0.44032	2.78216e-05
54948	'MRPL16'	mRNA	-0.318174	2.78269e-05
387882	'C12orf75'	mRNA	-0.48507	2.83204e-05
91574	'C12orf65'	mRNA	-0.576391	2.8378e-05
55116	'TMEM39B'	mRNA	-0.535182	2.87922e-05
51606	'ATP6V1H'	mRNA	0.429208	2.88936e-05
56904	'SH3GLB2'	mRNA	-0.306103	2.95377e-05
9552	'SPAG7'	mRNA	-0.507258	2.96307e-05
8797	'TNFRSF10A'	mRNA	0.493005	2.96619e-05
50848	'F11R'	mRNA	0.299163	2.9813e-05
54875	'CNTLN'	mRNA	-0.741016	2.98831e-05
1777	'DNASE2'	mRNA	-0.352566	2.99848e-05
253943	'YTHDF3'	mRNA	0.358734	3.05024e-05
79735	'TBC1D17'	mRNA	0.386937	3.10134e-05
4209	'MEF2D'	mRNA	0.464409	3.11829e-05
6879	'TAF7'	mRNA	0.304077	3.11831e-05
84836	'ABHD14B'	mRNA	-0.295632	3.13201e-05
127829	'ARL8A'	mRNA	0.336313	3.15849e-05
6038	'RNASE4'	mRNA	-1.04055	3.18528e-05
6924	'ELOA'	mRNA	0.374549	3.18528e-05
25804	'LSM4'	mRNA	-0.257634	3.22843e-05
3635	'INPP5D'	mRNA	0.348249	3.23507e-05
51629	'SLC25A39'	mRNA	-0.250702	3.23869e-05
10060	'ABCC9'	mRNA	0.562955	3.25029e-05
22853	'LMTK2'	mRNA	0.448919	3.26202e-05
[truncated: 2,914 more rows]
